# Supplementary material for: Novel aerosol extinction coefficients and lidar ratios over the ocean fromCALIPSO-CloudSat: Evaluation and global statistics
Source: Copernicus journal article supplement (doi:10.5194/amt-2018-363), 2018-11-06
Supplement: Supplementary file [file amt-2018-363-AC3-supplement.pdf]

1 **Novel aerosol extinction coefficients and lidar ratios over the ocean from**  
2 **CALIPSO-CloudSat: Evaluation and global statistics**

3  
4  
5 David Painemal<sup>1,2</sup>, Marian Clayton<sup>1,2</sup>, Richard Ferrare<sup>2</sup>, Sharon Burton<sup>2</sup>, Damien Josset<sup>3</sup>, and  
6 Mark Vaughan<sup>2</sup>

7 <sup>1</sup>Science Systems and Applications Inc., Hampton, VA, 23666 USA

8 <sup>2</sup>NASA Langley Research Center, Hampton, VA, 23666 USA

9 <sup>3</sup>US Naval Research Laboratory Stennis Space Center, MS, 39529, USA

10  
11 *Correspondence to:* David Painemal (david.painemal@nasa.gov)

12  
13 **Abstract.** Aerosol extinction coefficients ( $\sigma_a$ ) and lidar ratios (LR) are retrieved over the ocean  
14 from CALIPSO's [Cloud-Aerosol Lidar with Orthogonal Polarization \(CALIOP\)](#) attenuated  
15 backscatter profiles by solving the lidar equation constrained with aerosol optical depths (AOD)  
16 derived by applying the Synergized Optical Depth of Aerosols (SODA) algorithm to ocean surface  
17 returns measured by CALIOP and CloudSat's Cloud Profiling Radar.  $\sigma_a$  and LR are retrieved for  
18 two independent scenarios that require somewhat different assumptions: a) a single homogeneous  
19 atmospheric layer (1L) for which the LR is constant with height, and b) a vertically homogeneous  
20 layer with a constant LR overlying a marine boundary layer with a homogenous LR fixed at 25 sr  
21 (2-layer method, 2L). These new retrievals differ from the standard CALIPSO version 4.1 (V4)  
22 product, as the CALIOP-SODA method does not rely on an aerosol classification scheme to select  
23 LR. CALIOP-SODA  $\sigma_a$  and LR are evaluated using airborne high spectral resolution lidar (HSRL)  
24 observations over the northwest Atlantic. CALIOP-SODA LR (1L and 2L) positively correlates  
25 with its HSRL counterpart (linear correlation coefficient  $r > 0.67$ ), with a negative bias smaller than  
26 13.2%, and a good agreement for  $\sigma_a$  ( $r \geq 0.78$ ) with a small negative bias ( $\leq |-9.2\%$ ). Furthermore,  
27 a global comparison of optical depths derived by CALIOP SODA and CALIPSO V4 reveals  
28 substantial discrepancies over regions dominated by dust and smoke ([0.24](#)), whereas [Aqua's](#)  
29 [Moderate resolution Imaging Spectroradiometer \(MODIS\)](#) and SODA AOD regional differences  
30 are within 0.06.

31 Global maps of CALIOP-SODA LR feature high values over littoral zones, consistent with  
32 expectations of continental aerosol transport offshore. In addition, seasonal transitions associated

1 with biomass burning during June to October over the southeast Atlantic are well reproduced by  
2 CALIOP-SODA LR.

3

## 4 **1. Introduction**

5 Advances in our understanding of the 3D structure of atmospheric aerosols have been greatly  
6 accelerated with the advent of the Cloud-Aerosol Lidar with Orthogonal Polarization (CALIOP),  
7 onboard the Cloud-Aerosol Lidar and Infrared Pathfinder Satellite Observation (CALIPSO,  
8 Winker et al., 2009; 2010, 2013). CALIOP has provided the first global view of aerosol distribution  
9 in the boundary layer and free troposphere (Winker et al., 2013), progressed our knowledge of the  
10 long-range transport of dust (e.g. Liu et al., 2008; Uno et al., 2010; Yu et al., 2015) and smoke  
11 (e.g. de Laat et al., 2012; Das et al., 2017; Khaykin et al., 2018), and facilitated the evaluation of  
12 chemical transport models (Nowotnick et al., 2015; Koffi et al., 2016), among many other  
13 accomplishments in the area of aerosol and cloud research.

14 CALIOP estimates aerosol extinction coefficients on a global scale with an unprecedented  
15 vertical detail. The undetermined problem of solving the lidar equation with two physical  
16 unknowns, the aerosol extinction and backscatter coefficients, is addressed in the CALIPSO  
17 algorithm by relating both variables via an extinction-to-backscatter ratio, or lidar ratio (LR). This  
18 standard technique (e.g. Fernald, 1984) expresses the lidar equation in terms of only one unknown,  
19 if LR is prescribed. As aerosol types can be related to specific values of lidar ratios (e.g. Müller  
20 et al., 2007), the CALIPSO algorithm utilizes predefined LR assigned to a number of aerosol types,  
21 which in turn, are identified using the CALIPSO automated aerosol typing algorithm (Omar et al.,  
22 2009; Kim et al., 2018). Thus, the quality of CALIOP retrievals will depend on how well the actual  
23 lidar ratios match the pre-tabulated values and to what extent the aerosol typing algorithm properly  
24 classifies aerosols. Another source of uncertainty is the detectability limits of the CALIPSO  
25 algorithm, which prevents retrieving aerosol properties for tenuous aerosol layers (Rogers et al.,  
26 2014; Thorsen et al., 2017). For instance, Toth et al. (2018) found that no aerosol was detected  
27 within ~71% of the CALIOP profiles measured during daytime and ~41% of the nighttime  
28 measurements. More aerosol detection during nighttime is explained by the absence of solar  
29 background noise, which leads to a significantly better signal to noise ratio. The aforementioned  
30 factors likely explain discrepancies between CALIOP and other remote sensing datasets such as

1 those from the MODerate resolution Imaging Spectroradiometer (MODIS) and AERONET (e.g.  
2 Redemann et al., 2012; Schuster et al., 2012).

3         Uncertainty reduction in the selection of LR can be attained by constraining the lidar  
4 equation solution with an independent estimate of aerosol optical depth (AOD). This implies the  
5 minimization of the error between the retrieved AOD (estimated from the retrieved extinction  
6 coefficient coefficient) and the target AOD by iteratively adjusting LR. Burton et al. (2010) utilize  
7 AOD from the MODIS instruments on board both Aqua and Terra satellites for estimating aerosol  
8 extinction from CALIOP for cases in which AOD exceeds 0.15 (0.2) over the ocean (land).  
9 Similarly, Royer et al. (2010) applied an equivalent method for estimating LR and extinction  
10 coefficients over the Po Valley in Italy. Although CALIOP-MODIS retrievals in Burton et al.  
11 (2010) tend to compare better with airborne measurements relative to CALIPSO standard product  
12 (Version 2), MODIS AOD is limited to daytime, and MODIS and CALIOP differ in their along-  
13 track spatial resolution. These previous studies have proven the value of counting on independent  
14 CALIOP retrievals for evaluating CALIPSO's standard data products.

15         In this contribution, we present a new method in which CALIOP-based lidar ratios and  
16 aerosol extinction coefficients over the non-polar oceans are obtained by constraining the retrievals  
17 with AOD derived from cross-calibrated CALIOP and CloudSat Cloud Profiling Radar (CPR)  
18 surface echos, using the Synergized Optical Depth of Aerosols (SODA) product (Josset et al.,  
19 2008). SODA AOD is a suitable dataset, as it is collocated with CALIOP by definition and  
20 retrievals are possible during both daytime and nighttime for the period 2006-2011. After  
21 November 2011 SODA is only available for daytime, as CloudSat has operated in daylight-only  
22 operations mode to conserve power (Gravseth and Piepe, 2013). Our goal is to provide an  
23 independent CALIOP dataset that can be used for evaluating specific aspects of the CALIPSO  
24 Science Team product, as well as for investigating aerosol-related topics in climate research. We  
25 first summarize the algorithm and evaluate the new retrievals against state-of-the-art aerosol  
26 observations from the NASA Langley airborne High Spectral Resolution Lidar-1 (HSRL, Sections  
27 3 and 4). Next, we compare the CALIOP-SODA extinction coefficient and AOD with their  
28 CALIPSO Science Team Version 4 counterparts. Lastly, we present global maps of lidar ratio and  
29 marine boundary layer aerosol optical depth, and provide a physical interpretation for the regional  
30 patterns derived from CALIOP-SODA.

31

## 2. Dataset

### 2.1.CALIOP

Version 4.1 (V4) CALIOP elastic backscatter lidar measurements at 532 nm and 1064 nm are utilized in this work. For the derivation of CALIOP-SODA retrievals, we use Level 1 lidar attenuated backscatter and the Level 2 Vertical Feature Mask product, with a 333 m horizontal resolution below 8.2 km. CALIOP V4 aerosol extinction coefficients and AOD estimates are taken from the Level 2 Aerosol Profile product at 5 km horizontal resolution. [To reduce ambiguities in the CALIOP aerosol classification scheme, we restrict the analysis to samples with cloud-aerosol discrimination \(CAD\) scores higher than |50|, equivalent to at least medium confidence in the CALIOP layer classification \(Liu et al., 2019\).](#)

For comparing CALIOP SODA and V4 products, we follow the procedure outlined in Koffi et al. (2016): where the VFM feature classification flags indicate regions of clear air, we set the corresponding extinction coefficients to zero. While these regions are labeled as ‘clear air’, they are simultaneously assumed to be populated by highly diffuse aerosols that lie well below the CALIOP layer detection threshold. [Typically, the detection threshold is range-dependent, and varies as a function of molecular density, solar background and other instrument noise, and signal averaging \(Vaughan et al., 2009\).](#) In terms of AOD, global analysis of CALIOP V3 daytime data by Toth et al. (2018) show that the “aerosol-free” columns reported by the CALIOP algorithm correspond to a mean MODIS AOD of 0.03-0.05. A similar analysis by Kim et al. (2017) shows that, as expected, CALIPSO extinction and AOD retrieval capabilities are substantially better at night than during the day. These authors estimate a maximum mean undetected extinction coefficient of  $\sim 0.006 \text{ km}^{-1}$  during daytime versus  $\sim 0.003 \text{ km}^{-1}$  at night (see their Fig. 5c).

### 2.2.SODA aerosol optical depth

SODA uses the relationship between CALIOP (532 nm and 1064 nm) and CPR (3.1 mm, 94 GHz) surface return signals, along with a correction for the atmospheric transmission at the radar wavelength, to derive AOD at the lidar wavelengths. In short, SODA estimates of AOD rely on the radar-to-lidar ocean surface scattering cross-calibration for cloud-free columns (Josset et al., 2008, 2010). Consequently, SODA can provide a cloud-free AOD without having to rely on an accurate assignment of a particular aerosol type with an appropriate lidar ratio. In addition, the algorithm does not depend on pre-determined aerosol models with a specific particle size distributions and refractive indexes,

1 unlike MODIS. SODA AOD Version 2, based on CALIPSO Version 3 (V3), is developed at the  
2 ICARE data and services center (<http://www.icare.univ-lille1.fr>) in Lille (France) under the auspices  
3 of the CALIPSO mission and supported by the French National Centre for Space Studies (CNES).  
4 Josset et al. (2013) estimate a systematic error in SODA AOD of 0.015 and 0.059, respectively,  
5 for nighttime and daytime AOD. In addition, good agreement between SODA and MODIS has been  
6 reported in Josset et al. (2010, 2015), [with correlation coefficient > 0.89 and a mean difference of](#)  
7 [0.003](#), while Dawson et al. (2015) reports a root-mean-square-error of 0.03 between SODA and  
8 AERONET AOD and  $r = 0.59$  for AERONET sites near the coast. Further, we also evaluate SODA  
9 AOD with HSRL data in Section 4, and compare SODA and MODIS AOD over the global ocean in  
10 Section 6. While 1064 nm SODA AOD is also utilized in this study, caution needs to be exercised  
11 when using the 1064 nm SODA data due to calibration uncertainties in CALIPSO V3 (Vaughan et al.,  
12 2010).

13

### 14 **2.3.HSRL**

15 CALIOP retrievals are evaluated against airborne measurements by the NASA Langley High  
16 Spectral Resolution Lidar (HSRL-1, Hair et al., 2008) at 532 nm. The instrument allows for the  
17 independent determination of aerosol extinction and backscatter coefficients at 532 nm (and thus,  
18 lidar ratio) using the HSRL technique (Eloranta, 2005). [HSRL 532 nm AOD and aerosol extinction](#)  
19 [coefficients have been regularly validated against other airborne instruments, with biases less than](#)  
20 [6% and 3%, respectively \(Rogers et al. 2009\), and generally to within 0.03 in comparison with](#)  
21 [AERONET AOD \(Sawamura et al., 2017\). The AOD product from the HSRL instrument makes](#)  
22 [use of the molecular channel which is a direct observation of atmospheric attenuation between the](#)  
23 [aircraft and the surface when compared against the GEOS-5 molecular density profile \(Rogers et](#)  
24 [al. 2009\). Since this method requires no assumptions about the lidar ratio or assumptions that the](#)  
25 [lidar ratio is constant, it provides a useful truth measurement in the context of this study.](#)

26 As HSRL measurements at 1064 nm are limited to attenuated backscatter, similar to CALIOP,  
27 only 532 nm HSRL retrievals will be utilized in this study. The data used in this study were  
28 acquired August 11–27, 2010 while the HSRL conducted a dedicated CALIPSO validation  
29 campaign over the Caribbean Sea (Burton et al., 2013; Rogers et al., 2014). As required for all  
30 HSRL-CALIPSO validation measurements, the HSRL flight paths during this campaign were  
31 spatially matched with coincident CALIPSO ground tracks (Rogers et al., 2014).

### 3. Derivation of aerosol extinction coefficient and lidar ratio

The method for deriving aerosol extinction coefficient ( $\sigma_a$ ) and lidar ratio (LR) is based on Fernald (1984) applied to the CALIOP attenuated backscatter, and is briefly summarized in the following. For CALIOP, the lidar equation is expressed in terms of height  $z$  (range) as:

$$\beta_{att}(z) = (\beta_m(z) + \beta_a(z)) \cdot \exp\left(-2 \int_0^z (\sigma_m(z') + \sigma_a(z')) dz'\right) \quad (1)$$

Where  $\beta_{att}$  corresponds to the CALIOP total attenuated backscattering cross section,  $\beta_m$  and  $\beta_a$  denote the molecular ( $m$ ) and aerosol ( $a$ ) backscatter coefficients, and  $\sigma_m$  and  $\sigma_a$  are the molecular and aerosol extinction coefficients. Since the molecular contribution can be accurately estimated using atmospheric profiles from numerical weather models, the two unknowns are  $\beta_a(z)$  and  $\sigma_a(z)$ . Equation (1) can be reduced to one unknown by relating extinction and backscatter coefficient via their lidar ratio, that is

$$LR(z) = \frac{\sigma_a(z)}{\beta_a(z)}. \quad (2)$$

It follows that eq. (1) can be expressed in terms of LR and  $\beta_m$  as:

$$\beta_{att}(Z) = (\beta_m(z) + \beta_a(z)) \cdot \exp\left(-2 \int_0^z (\sigma_m(z') + LR(z') \cdot \beta_a(z')) dz'\right) \quad (3)$$

The conventional method to solve eq. (3) follows Fernald (1984) and consists of iteratively solving for  $\beta_a$ , assuming a functional form of the lidar ratio  $LR(z)$ . The LR selection is physically constrained by comparing the retrieved aerosol optical depth. ( $AOD_{ret} = \int_0^z \sigma_a(z') dz'$ ) with SODA AOD ( $AOD_{SODA}$ ), and LR is iteratively adjusted until the retrieved AOD matches the SODA AOD to within 0.001 or less (i.e., when  $|AOD_{ret} - AOD_{SODA}| \leq 0.001$ ). While the distribution of LR with height can be specified in different ways (e.g. Ansmann, 2006), here we opt for two assumptions, which in turn yield two independent sets of aerosol extinction and lidar ratio retrievals:

- A. 1-layer lidar ratio (1LR): The simplest assumption is to consider one constant lidar ratio with height. This method is expected to perform well for atmospheric profiles characterized by only one aerosol type.

1 B. 2-layer lidar ratio (2LR): We also consider an additional scenario, which consists of  
2 treating the atmospheric column as two layers, that is, the marine atmospheric boundary  
3 layer (MBL) and a second aerosol layer of as-yet-undetermined composition. This method  
4 is intended to better capture specific events with two predominant aerosol types,  
5 particularly smoke over marine aerosols and dust over marine aerosols, which are  
6 particularly frequent over the Atlantic Ocean. The LR for the MBL is assumed constant at  
7 25 sr, as suggested by HSRL measurements over the ocean (Burton et al., 2012; 2013).  
8 This lidar ratio is slightly higher than the value of 23 sr assumed by Kim et al. (2018) and  
9  $18 \pm 5$  sr reported by Groß et al. (2013) at Cape Verde Islands (14.9°N, 23.5°W). In contrast,  
10 532 nm Raman lidar observations at Barbados (13°N, 59°W) encompass MBL lidar ratios  
11 between 21 and 35 sr, with magnitudes primarily controlled by free tropospheric intrusions  
12 of dust (Groß et al., 2015) and the environmental relative humidity (Haaring et al., 2017).  
13 A similar range of MBL lidar ratios was observed in the eastern Atlantic by Bohlmann et  
14 al. (2018), with values modulated by the presence of dust-smoke aerosols. Without a-priori  
15 knowledge of MBL lidar ratio, the value prescribed here (25 sr) is within the range reported  
16 in previous studies over the ocean.  $\sigma_a(z)$  and the upper layer LR are iteratively calculated  
17 using the Fernald method with the constraint provided by  $AOD_{SODA}$ , and LR =25 sr in  
18 MBL. MBL height is computed by applying the bulk Richardson number method  
19 (McGraw-Spangler and Molod, 2014).

20 The CALIOP attenuated backscatter ( $\beta_{att}$ ) at 333 m resolution is taken from the Level 1  
21 CALIPSO product and averaged to achieve a 1 km along-track resolution. Similarly, SODA AOD  
22 retrieved at 333m is averaged to 1 km resolution. In addition, the Feature Classification Mask  
23 product is utilized for identifying cloudy pixels and cases with fully attenuated signal, in which  
24 CALIOP-SODA retrievals are not possible. The molecular components in eq (3) are derived from  
25 the Goddard Earth Observing System Model Version 5 (GEOS-5), with  $\beta_m$  estimated as a function  
26 of air density, and the effect of ozone attenuation in  $\sigma_m$  is accounted for following Vaughan et al.  
27 (2005). Lastly, MBL height for the 2LR method is also computed from GEOS-5.

#### 28 29 **4. CALIOP-SODA evaluation with airborne HSRL measurements**

30 CALIOP-SODA retrievals of aerosol extinction coefficient, lidar ratio and AOD are  
31 evaluated using eight flights during August 2010 over the western Atlantic, for the domain

1 bounded by 70°W-55°W and 13°N-35°N (Figure 1a). CALIOP-SODA is spatially averaged to  
2 match the nominal 5 km horizontal resolution of CALIPSO V4, and only samples with 5-km cloud-  
3 free scenes are retained. Both CALIPSO V4 and CALIOP-SODA are then spatially collocated  
4 with the aircraft track (Figure 1) for samples with a temporal mismatch of less than 90 minutes  
5 (Rogers et al., 2014). Lastly, satellite and airborne observations are spatially averaged to a common  
6 0.2 ° resolution (in latitude). It is worth noting that although the CALIOP V4 data products are  
7 reported at a uniform horizontal resolution of 5 km, in reality, larger spatial averaging of the lidar  
8 signal is required (20 or 80 km) for tenuous aerosol layers to increase the aerosol layer detectability  
9 in the CALIPSO aerosol classification scheme. Thus, the use of an 0.2° horizontal average for  
10 comparing airborne and satellite observations is adequate when considering possible spatial  
11 averaging of the CALIOP V4 retrievals. Approximately 42 and 46 0.2°-samples were collocated  
12 with HSRL (CALIOP-SODA and CALIOP, respectively).

13 The HSRL measurements during Caribbean 2010 were characterized by the presence of  
14 dust, dust mixed with maritime aerosols, and continental pollution; the occurrence of pure  
15 maritime aerosols was confined to the boundary layer (Burton et al., 2013). This aerosol typing is  
16 manifested in a lidar ratio of 25 sr below 500 m, and a linear increase with height that reaches  
17 values of 40-45 sr in the free troposphere (Fig. 1b). These measurements also provide support for  
18 the use of a lidar ratio of 25 sr in the boundary layer for the 2L method. Before evaluating aerosols  
19 extinction coefficients and lidar ratios, we compare SODA AODs and CALIOP V4 AODs against  
20 their HSRL counterparts (Fig. 2a). In general, both CALIOP-based retrievals correlate well with  
21 the HSRL ( $r \geq 0.94$ ), with a slightly higher correlation for SODA, and absolute bias between 10-  
22 17%), with SODA underestimating and CALIOP V4 overestimating AOD. Linear fits of SODA  
23 and V4 AOD relative to HSRL (red and blue lines in Fig. 2a) indicate that the SODA bias is  
24 relatively constant with AOD whereas a V4 AOD overestimate tends with increase with AOD  
25 especially during nighttime. Nighttime and daytime correlations remain approximately the same  
26 for both CALIOP V4 and SODA. However, V4 linear correlation coefficient for AOD < 0.3 are  
27 slightly lower for daytime ( $r = 0.78$ ) than nighttime ( $r = 0.94$ ), whereas SODA daytime/nighttime  
28 correlations for low AOD remain high ( $r \geq 0.93$ ). The reduced daytime correlation for CALIOP  
29 V4 is expected as the reduced signal to noise ratio due to the solar background signal hampers the  
30 algorithm's ability to detect and classify aerosols. Finally, in terms of the root-mean-square error



1 (RMSE), SODA RMSE (24.2% relative to the mean) is smaller than that for CALIOP V4 (31.2%,  
2 Table 1).

3 The evaluation of CALIOP-SODA lidar ratio and aerosol extinction coefficient is  
4 summarized in the following. For LR, we use the column-effective lidar ratio (Ansmann, 2006),  
5 calculated as

$$6 \quad LR_{HSRL} = \frac{\sum_{z=z_0}^{z_1} \sigma_a(z)}{\sum_{z=z_0}^{z_1} \beta_a(z)}, \quad (4)$$

7 with  $z_1$  denoting the highest altitude with  $\sigma_a$  HSRL retrievals (~6.5 km). For evaluating CALIOP  
8 SODA 1L LR,  $LR_{HSRL}$  in eq. (4) is estimated using the last range bin above the ocean surface (37.8  
9 m) as the lower bound,  $z_0$ . In addition, the comparison between CALIPSO SODA 2L LR and  
10  $LR_{HSRL}$  is performed by recomputing  $LR_{HSRL}$  using the MBL height for  $z_0$  in eq. 4. Since valid  
11 HSRL extinctions retrievals are only derived for heights above 270 m from the surface, we have  
12 assumed a constant extinction coefficient for the layer below 270 m, with values taken from the  
13 lowest height with available retrievals (~ 270 m). The comparison depicted in Fig. 2b, yields  $r =$   
14 0.67-0.72 between both CALIOP-SODA methods (1L and 2L) and HSRL, with a negative mean  
15 bias smaller than 17.4%, and RMSE of up to 8.7 sr (Figure 2b and Table 2).

16 Mean vertically-resolved aerosol extinction coefficients from SODA, CALIOP V4, and  
17 HSRL are depicted in Figure 3a and b for daytime and nighttime observations, respectively. The  
18 agreement between HSRL (red) and CALIOP-SODA 1L and 2L (overlapped gray and black) is  
19 remarkable throughout the lower troposphere, with a maximum overestimation of  $0.027 \text{ km}^{-1}$   
20 (50%) near 500 m. CALIOP-SODA 1L and 2L yield identical results, which is likely the effect of  
21 a shallow marine boundary layer (<500 m). In contrast, CALIOP V4 (blue) consistently  
22 overestimates the airborne measurements for heights below 1 km during both daytime and  
23 nighttime, with magnitudes up to  $0.102 \text{ km}^{-1}$  (100%) relative to the HSRL during nighttime and  
24  $0.078 \text{ km}^{-1}$  (140%) during the day. This overestimate is explained by the CALIPSO V4 constant  
25 lidar ratio of 37 sr for dusty marine aerosol, which is generally higher than the lidar ratio retrieved  
26 by both the HSRL and SODA for Caribbean 2010 (Figure 2b). Interestingly, both CALIOP-SODA  
27 and CALIOP V4 correlate well with the HSRL, with correlations around 0.80 (Table 3). The  
28 RMSE for CALIOP V4 is also higher than that for CALIOP-SODA especially below 1 km, with  
29 maxima around  $0.12 \text{ km}^{-1}$  (155%) and  $0.06 \text{ km}^{-1}$  (83%) for CALIOP V4 and CALIOP-SODA,  
30 respectively (Fig 3c). Aerosol extinction coefficient statistics for the atmospheric column below

1 3.0 km (Table 2) corroborate the overall smaller bias and RSME of CALIOP-SODA relative to  
2 V4.

3

## 4 **5. Global analysis**

### 5 **5.1. Preliminary comparison between CALIOP-SODA, MODIS, and CALIOP-V4 AOD**

6 Five months of collocated SODA, CALIOP V4 Level 2, and Aqua-MODIS data during  
7 June-October 2010 were compared over non-polar oceanic regions with the goal of identifying the  
8 main differences in aerosol extinction coefficient profiles. This period was selected because of the  
9 high global climatological AOD observed over the ocean by CALIOP (e.g. Yu et al., 2010). We  
10 first averaged 1km CALIOP-SODA to the V4 Level 2 nominal resolution (5km) and only samples  
11 with 5-km cloud-free scenes are utilized. This is intended to minimize the potential effect of  
12 overcast scenes in the retrievals and aerosol swelling near the cloud edges (Várnai and Marshak,  
13 2011). Then, CALIOP-SODA and CALIOP V4 data were further reduced by averaging the  
14 retrievals to a common 25 km resolution. Cloud cover was derived from the 333 m Vertical Feature  
15 Mask and determined as the ratio between profiles with at least one cloudy feature in the  
16 atmospheric column to the total. To circumvent CALIOP's narrow field of view, we calculated  
17 the statistics in 6°x3° (longitude x latitude) grids.

18 We first focus on the AOD difference ( $\Delta$ AOD) between CALIOP V4 and SODA at 532  
19 nm and 1064 nm, for day and nighttime (Figure 4). Daytime 532 nm  $\Delta$ AOD maps reveal higher  
20 V4 AOD than SODA for the northeast Atlantic (NEA) and the Indian Ocean (IO), whereas V4  
21 AOD is smaller than SODA over the southeast Atlantic (SEA) and over vast regions of the open  
22 ocean. These differences are similar to those observed between CALIOP V3 and MODIS  
23 (Redemann et al., 2012). Overall, nighttime differences in 532 nm AOD appear to diminish  
24 especially for the SEA and the northwest Pacific (NWP), while the positive  $\Delta$ AOD remains high  
25 over IO and NEA.

26 To verify that SODA-CALIPSO V4 differences are mainly attributed to CALIPSO V4  
27 biases, we perform an additional comparison using Aqua-MODIS Level 2 550 nm AOD  
28 (MYD04\_3K product), taken from the latest Collection 6.1 (Levy et al., 2013) for the June to  
29 September period of 2010. Cloud-free 3-km MODIS AOD pixels are collocated with the  
30 CALIPSO track and averaged to approximately 25 km (along track) to match the averaged 25 km  
31 SODA retrievals. Next, MODIS-SODA mean differences are averaged every 6°x3° grid, and

1 depicted in Figure 5. The MODIS-SODA differences in Figure 5 are typically within the  $\pm 0.06$   
2 range. Although  $\Delta AOD$  reaches up to 0.12 over the Indian Ocean, these differences are smaller  
3 than those between CALIPSO V4 and SODA (Figure 4, upper left panel). Overall, MODIS further  
4 corroborates that CALIPSO V4 AOD is biased low over regions dominated by smoke and dust.  
5 We note that the plausible oceanic CALIOP V4 bias dependence on aerosol types suggested in our  
6 study might not be applicable over land, where AOD for dust is underestimated by CALIPSO (e.g.  
7 Schuster et al., 2012).

8 We also show  $\Delta AOD$  for the 1064 nm channel in Figure 4 (lower panels). The largest  
9  $\Delta AOD$  values are mostly confined to the NEA and IO domains, with higher values for SODA  
10 AOD, while nighttime  $\Delta AOD$  are similar to its daytime counterpart.

## 12 **5.2. CALIOP-SODA and CALIOP V4 aerosol extinction profiles**

13 Matched CALIOP-SODA and CALIOP V4 mean vertical profiles of aerosol extinctions  
14 over the regions defined in Figure 4 (black boxes) are shown in Figs. 6 and 7, for the 532 nm and  
15 1064 nm channels, respectively. The main differences, in agreement in AOD differences in Figure  
16 4, are found: a) over IO and NEA where CALIPSO V4 extinction profiles are higher than  
17 CALIOP-SODA, and b) over SEA, with lower V4 extinctions than CALIOP-SODA. Even though  
18 the main V4-SODA differences in extinction decrease during nighttime, especially over the SEA,  
19 the nighttime differences for NEA and IO remain nearly the same. Interestingly, the higher  
20 CALIOP V4 extinction for NEA and IO resembles the CALIPSO V4 overestimation during  
21 Caribbean 2010 (Fig. 3). CALIOP-SODA and V4 profiles differences for regions with small AOD  
22 differences, such as the south Pacific (SP) and the northwest Pacific (NWP), are modest. Another  
23 interesting aspect is the generally higher variability of daytime CALIPSO V4 relative to SODA,  
24 manifested in the high standard deviations in Figure 5 (error bars). This indicates that SODA  
25 retrievals are more stable than CALIPSO V4 especially during the daytime, due to the AOD  
26 constraint. Moreover, the high solar background substantially degrades CALIPSO aerosol  
27 detection capabilities, affecting the retrieved extinction. Lastly, CALIOP-SODA differences  
28 between 1L and 2L are small, and typically confined to a layer below 700 m, where 2L tends to be  
29 smaller than 1L. This is explained, as in Section 4, by a relatively shallow mixed-layer height ( $<$   
30 500 m), where  $LR = 25$  sr for the 2L method.

1 For completeness, we show in Figure 7 the aerosol extinction profiles for the 1064 nm  
2 channel. CALIOP-SODA and V4 profiles yield smaller differences relative to their 532 nm  
3 counterpart, in agreement with  $\Delta$ AOD (Figure 4).

### 5 **5.3. Maps of CALIOP-SODA Lidar ratio (LR) at 532 nm**

6 The number of 25-km samples utilized in the following SODA LR analysis is depicted in  
7 Figure 8. The extratropical regions yield the smallest number of samples (<80), whereas the  
8 occurrence of clear-sky scenes is the highest over subtropical open ocean, with  $\sim$  400 retrievals  
9 (note that approximately at least 8 1-km samples are contained in one 25-km averaged sample with  
10 cloud fraction < 67%). During nighttime, the number substantially decreases due to the cloud  
11 diurnal cycle. Figures 9 and 10 depict global maps of 532 nm LR derived from the 1L ( $LR_{1L}$ ) and  
12 2L ( $LR_{2L}$ ) assumptions, temporally averaged from March to August (MAMJJA, boreal spring-  
13 summer) and September to February (SONDJF, boreal autumn-winter) of 2010 from the 25-km  
14 averaged retrievals with cloud fraction less than 67%. Daytime 532 nm LR exhibits a clear spatial  
15 pattern with high values (>45 sr) in coastal regions especially off the southwestern African coast  
16 and east of China. The lowest values are observed over the western and central equatorial Pacific,  
17 with ratios less than 30 sr, which are typical of clean maritime environments (e.g. Burton et al.,  
18 2013). Semiannual transitions are primarily found near the continents, namely, the Southeast  
19 Atlantic, Mediterranean Sea, Indian Ocean, and off the coast of eastern Asia. Nighttime LRs are  
20 similar to their daytime counterparts, but with slightly higher values and a rather heterogeneous  
21 pattern, attributed to the reduced cloud-free sampling at night due to the increased cloud cover,  
22 especially over subtropical regions and the Southern Ocean (Figures 8b and d), where stratiform  
23 and shallow cumulus clouds are abundant.

24 Comparing the two-layer assumptions,  $LR_{2L}$  (Figure 9) is higher than  $LR_{1L}$ , especially for  
25 lidar ratios > 40 sr. This result is expected, as the prescribed MBL lidar ratio of 25 sr for 2L tends  
26 to be lower than the lidar ratio for any aerosol type that would be found above the marine boundary  
27 layer, and therefore lower than the column average or column effective lidar ratio. Therefore, to  
28 match the SODA AOD, the lidar ratio above the MBL in the 2L case must be larger than the  
29 column effective value that the 1L case derives. Overall,  $LR_{1L}$  and  $LR_{2L}$  differences are relatively  
30 small ( $\sim$  5 sr), which, as we will show in the next section, is associated with the shallow MBL

1 height estimated from the bulk Richardson number method, and therefore a relatively small  
2 fraction of aerosol that is controlled by the assumed marine lidar ratio in the 2L method.

#### 4 **5.4. Fractional CALIOP-SODA AOD at 532 nm in the marine boundary layer**

5 CALIOP-SODA aerosol extinctions are further utilized for quantifying AOD in the  
6 boundary layer. We first show in Figure 11 the 2010 semiannual total SODA AOD for daytime  
7 (left) and nighttime (right) CALIPSO overpasses. Consistent with several studies (e.g. Kittaka et  
8 al., 2011; Redemann et al., 2012), high AOD primarily occur over the eastern Atlantic, in  
9 connection with biomass burning and dust emissions from southern and equatorial Africa. A  
10 second region of interest encompasses most of the Asian coastal region, where a combination of  
11 pollution and dust give rise to high AOD (Itahashi et al., 2010).

12 Before presenting MBL AOD, we show the MBL height maps (Figure 12), with typical  
13 heights below 800 m, and littoral maxima up to 1150 m in northern Africa and Eurasia. Next, we  
14 compute MBL AOD by numerically integrating CALIOP-SODA aerosol extinction coefficient  
15 from the surface to the MBL height. MBL AOD in Figure 13 shows a dissimilar pattern relative  
16 to its total AOD counterpart (Figure 11), manifested in a less dominant role of the southeast  
17 Atlantic. In addition, coastal Africa, Eurasia, and North America exhibit peaks in MBL AOD  
18 ( $>0.12$ ) during boreal spring-summer. A second region with high AOD encompasses the  
19 extratropical oceans poleward of  $45^\circ\text{S/N}$ , with a particularly consistent zonal band with high AOD  
20 in the Southern Ocean. As expected, 2L MBL AOD is lower than 1L due to the 2L assumption of  
21 a lidar ratio = 25 sr in the MBL. Except for the subtropical ocean, which features shallow MBL  
22 and low MBL AOD, a spatial modulation of the marine boundary layer in the MBL AOD is  
23 unclear. It is important to mention that estimates of the AOD apportioned in the boundary layer  
24 will depend on the MBL dataset utilized in the calculations. An alternative MBL height estimation  
25 derived from CALIOP attenuated backscatter (McGrath-Sprangler and Denning, 2013) yields  
26 similar if not higher values than our GEOS-based MBL. However, MBL estimates based on  
27 thermodynamical vertical profiles (temperature, relative humidity) from meteorological analyses  
28 produce significantly higher MBL (von Engel and Teixeira, 2013), closely matching the cloud  
29 top height of stratiform and shallow cumulus clouds. Thus, the MBL used here is expected to  
30 primarily represent the mixed-layer height (von Engel and Teixeira, 2013).

1           The fraction of MBL AOD relative to the total is depicted in Fig. 14. The extratropical  
2 bands show the highest fraction of MBL AOD, accounting for up to 0.73 (73%) of the total AOD.  
3 Low fractions are found in the subtropics and tropics, with the lowest AOD fraction over the  
4 eastern Atlantic and the west-central Pacific. Interestingly, vast areas over the ocean feature AOD  
5 fractions of less than 40%, suggesting a significant contribution of free tropospheric aerosols to  
6 the total AOD. These results are qualitatively consistent with the results Bourgeois et al. (2018)  
7 using CALIPSO version 4.1.

## 8 9           **6. Discussion**

10           One of the few global satellite-based estimates of lidar ratio is reported in Bréon (2013)  
11 who estimated LR utilizing the retrieved scattering phase function at 180° angle derived from the  
12 Polarization and Directionality of the Earth's Reflectances (POLDER) satellite instrument and a  
13 prescribed aerosol model. POLDER LR and CALIOP-SODA (Figure 9-10) yield high LR over the  
14 coasts of eastern Africa and Eurasia, and a notable increase in LR over the Indian Ocean in boreal  
15 autumn-winter. In addition, both POLDER and CALIOP-SODA produce LR < 30 sr over the open  
16 ocean. On the other hand, LR from POLDER tend to be slightly higher, with a typical range  
17 between 30-70 sr. Bréon (2013) also indicates that because POLDER retrievals rely on scattered  
18 photon measurements, LR might be biased low in regions dominated by absorbing aerosol, such  
19 as the southeast Atlantic. A somewhat different method of retrieving LR from SODA AOD,  
20 documented in Josset et al. (2011), consists of analytically solving the lidar equation. The only  
21 available global analysis of LR using the technique in Josset et al. (2011) is documented in Dawson  
22 et al. (2015) for maritime aerosols only, reporting values between 20-40 sr.

23           As different aerosol types can be, to some extent, characterized by their lidar ratio, the  
24 reliability of CALIOP-SODA LR retrievals is qualitatively assessed by analyzing the consistency  
25 between the CALIOP-SODA LR spatial pattern and the regional occurrence of aerosol types as  
26 well as lidar measurements from several field campaigns over the ocean. Burton et al. (2012),  
27 using HSRL measurements over North America and the adjacent Atlantic Ocean, provide the  
28 following lidar ratios for a number of aerosol types: the highest LR (45-80 sr) are typically  
29 attributed to smoke and urban aerosols, LR of 25-50 sr and 40 sr are associated with dust and  
30 polluted maritime aerosols (respectively), and maritime aerosols are characterized by lidar ratios

1 of less than 30 sr. For simplicity, we will primarily interpret daytime  $LR_{IL}$  in Figures 9a and c for  
2 the following regions of interest:

3       **6.1 Southeast Atlantic:** The SODA LR peak in the southeast Atlantic is explained by the  
4 well-documented biomass burning season over southern Africa, with massive fires events from  
5 May to September during the dry season (Roberts et al., 2009), and smoke being transported  
6 offshore by the prevailing winds during July to October (Adebisi et al, 2015). [HSRL airborne](#)  
7 [measurements collected in September 2016 \(Burton et al., 2018\)](#) show 532 nm LR in the range 58-  
8 [76 sr in the free troposphere, with CALIOP-SODA yielding values in the lower bound of the HSRL](#)  
9 [measurements \(55-60 sr\)](#). In addition, shipborne Raman lidar observations south of the region  
10 dominated by biomass burning aerosols (30°S, near the South African coast) reveal a transition  
11 from a lower troposphere dominated by smoke to one mainly composed of maritime aerosols (lidar  
12 ratios less than 25 sr, Bohlmann et al., 2018). This southward reduction in LR is reproduced by  
13 [CALIOP-SODA](#).

14       **6.2. Mediterranean Sea:** The high spring-summer SODA LR over the Mediterranean Sea  
15 (~ 50 sr) is also expected given the southward pollution transport from Europe which is maximized  
16 in summer in the boundary layer (Duncan and Bey, 2004). [Moreover, lidar observations show a](#)  
17 [maximum dust AOD over the Mediterranean Sea \(southern Italy\) in summer \(Mona et al., 2006\),](#)  
18 [in connection with a Saharan dust layer in the free troposphere. The higher presence of pollution](#)  
19 [and dust in spring would explain the high CALIOP-SODA LR in spring-summer \(MAMJJA\)](#).

20       **6.3. Bay of Bengal and western Pacific Ocean:** A major LR maximum in autumn-winter  
21 (SONDJF) is observed south of India, over the Bay of Bengal and part of the Arabian Sea. This  
22 pattern is concomitant with the pervasive presence of pollution and biomass burning during the  
23 winter and pre-monsoon season (October to April, Krishnamurti et al., 2009). In contrast, during  
24 the monsoon season (June-September), dust aerosols become the dominant species over the Bay  
25 of Bengal (Das et al., 2013), which is manifested in the reduction in SODA LR in spring-summer  
26 (MAMJJA). [Further east, off the coast of eastern China and Korea, a semi-annual contrast is](#)  
27 [retrieved by SODA, with maximum  \$LR > 55\$  sr for SONDJF. Changes between autumn and spring](#)  
28 [were also observed over the Korean peninsula in the lidar ratios retrieved with a Raman lidar \(Noh](#)  
29 [et al., 2008\), with layer-mean of 56 sr and 63 sr for spring and autumn, respectively, and larger](#)  
30 [differences in the free troposphere. These changes are thought to be primarily explained by](#)  
31 [seasonal changes in the composition of dust and smoke.](#)

1           6.4. Eastern Pacific and Southern Ocean: Regions with intermediate CALIOP-SODA LR  
2 (35 sr < LR < 50 sr) are located over broad regions of the eastern Pacific and the east coast of North  
3 America. These regions are likely influenced by a combination of maritime aerosols and pollution  
4 from the continents. It is nevertheless surprising the high SODA lidar ratios retrieved over rather  
5 pristine regions, especially over the Southern Ocean, where maritime aerosols are expected to be  
6 the dominant aerosol type. A plausible factor that may help reconcile high LR for maritime  
7 aerosols is a lidar ratio increase with relative humidity (Ackerman 1998). Relative humidity could  
8 also explain the presence of LR >30 sr over stratocumulus cloud regimes, where high relative  
9 humidity is confined in the boundary layer.

10           6.5. Central Pacific and northern Atlantic: The regions with the lowest LR are located over  
11 the tropical Pacific Ocean, where AOD is the lowest (Figure 11). An unanticipated result is the  
12 absence of a zonal band across the Atlantic that could be attributed to the westward transport of  
13 Saharan dust across the Atlantic Ocean. Unfortunately, due to the lack of in-situ observations along  
14 the Saharan dust pathways, the assessment of SODA LR over this region is challenging. Raman  
15 lidar data over the eastern Atlantic (Cape Verde), off the coast of western Africa, in spring show  
16 dust and smoke in the free troposphere and boundary layer with a mean LR of 54 sr (Tesche et al.,  
17 2011), and a dust layer thickness of about 4 km. Over the same region, SODA LR is 40 sr, which  
18 increases up to 45-50 sr when LR is estimated using the 2L assumption. Ground-based lidar  
19 observations over the western Atlantic (Barbados, 13.14° N, 59.62° W) in summer reveal the  
20 presence of maritime aerosols and dust, with lidar ratios of less than 40 sr in the boundary layer,  
21 and pure dust aerosols generally confined to the free troposphere (Groß et al., 2015). This suggests  
22 that the relatively low CALIOP-SODA LR over the Atlantic basin may be explained by the  
23 contribution of maritime aerosols in the boundary layer. A more quantitative assessment, which  
24 includes the analysis of specific dust events, is left for future work. Lastly, the interpretation the  
25 1064 nm CALIOP-SODA is not attempted here due to the lack of independent measurements and  
26 calibration uncertainties associated with the use of CALIPSO V3 for deriving SODA AOD. A  
27 future release of SODA based on CALIPSO V4 will benefit from the improved calibration of V4,  
28 which is estimated to be within 3% (Vaughan et al., 2018).

29           An aspect that deserves further discussion is the reliability of SODA AOD, as it is essential  
30 for constraining the lidar equation in our study. In this study we find a high linear correlation  
31 between SODA and HSRL AOD ( $r=0.96$ ), with no clear relationship between SODA biases and



1 AOD magnitudes, and a SODA-to-HSRL RSME comparable to the one estimated between SODA  
2 and AERONET in Dawson et al. (2015). The differences between SODA, CALIPSO V4, and  
3 MODIS AOD (Figures 4 and 5) also support inferences based on comparisons between MODIS  
4 and CALIPSO Science Team AOD over the ocean (Redemann et al., 2012; Kim et al., 2013).  
5 Redemann et al. (2012) and our results both point to an overestimation of CALIPSO V4 AOD over  
6 oceanic regions dominated by dust, and underestimation in regions dominated by smoke. However,  
7 errors in SODA AOD are plausible, especially when considering the sometimes large differences  
8 between SODA and MODIS AOD ( $>0.06$ , Figure 5). To assess the uncertainty in the retrieved  
9 CALIOP-SODA LR attributed to errors in SODA AOD, we assume a  $\pm 20\%$  perturbation in SODA  
10 AOD and estimated LR. A 20 % AOD error is similar to the 24 % RMSE between SODA and the  
11 airborne HSRL AOD (Section 4). For one CALIPSO overpass we found that a 20% higher SODA  
12 AOD gives rise to a 5.4 sr increase in lidar ratio, or equivalent to a 14.4% lidar ratio change relative  
13 to the LR constrained with unperturbed AOD. Similarly, a 20% lower SODA AOD yields a 6.0 sr  
14 decrease in lidar ratio (-16.0%). These results are analogous to the  $\Delta$ AOD uncertainty of 18 % (for  
15 AOD=0.15) attributed to a 15% error in the lidar ratio prescribed by the CALIPSO algorithm,  
16 derived using the AOD error equation in Winker et al. (2009).

17

## 18 **7. Concluding remarks**

19 One year of a new CALIOP-based aerosol extinction coefficient and lidar ratio dataset has  
20 been presented, with the goal of providing a flexible dataset for climate research as well as  
21 independent retrievals that can be helpful for refining CALIPSO Science Team algorithms. The  
22 new retrievals build on the CALIPSO V4 total attenuated backscatter and cloud mask data  
23 products. However, the method that we used to invert the lidar equation differs fundamentally from  
24 the CALIOP standard aerosol product, as it does not rely upon an aerosol classification module to  
25 prescribe the lidar ratio. We evaluated CALIOP-SODA AOD, LR, and extinction using airborne  
26 HSRL retrievals over the western Atlantic, and found excellent agreement, with statistically  
27 significant correlations and biases less than 27 %. Given these encouraging results, we envision  
28 potential uses of CALIOP-SODA lidar ratios for evaluating CALIOP V4 aerosol properties. This  
29 can be done similar to Dawson et al. (2015), by stratifying CALIOP-SODA LR as a function of  
30 CALIOP V4 aerosol types and their assigned lidar ratio.

1           Although the retrievals presented here are limited to cloud-free atmospheric columns due  
2 to the constraint imposed by SODA AOD, it is possible to adapt the algorithm to make use of  
3 above-cloud satellite AOD retrievals (e.g., Jethva et al., 2014; Liu et al., 2015). In this regard,  
4 above-cloud AOD using CALIOP can be derived by combining the integrated attenuated  
5 backscatter and depolarization ratio (Hu et al., 2007; Liu et al., 2015), with corrections for the  
6 multiple-scattering depolarization relationship implemented by SODA (Deaconu et al., 2017).  
7 Efforts to retrieve above-cloud lidar ratio and extinction profiles over the southeast Atlantic using  
8 the above cloud AOD are currently underway (Ferrare et al., 2018).

9           CALIOP-SODA 1L retrievals are expected to perform better for relatively homogeneous  
10 atmospheric profiles characterized by a single aerosol type. Alternatively, SODA 2L retrievals are  
11 likely to be advantageous for specific regions where massive aerosol plumes from the continent  
12 are transported offshore at high altitudes through convective processes, in such a way that MBL  
13 aerosols are detached from the layer above and the assumption MBL LR=25 sr (maritime) is a  
14 good approximation. This is probably the case over the southeast Atlantic during the biomass  
15 burning season or for episodic dust transport over the tropical Atlantic. However, the CALIPSO  
16 Science Team product will continue providing the best available global dataset for monitoring  
17 complex aerosol profiles, continental processes, and aerosols in the upper troposphere.

18  
19 *Data availability.* CALIPSO version 4.1 is available at <https://eosweb.larc.nasa.gov>, and SODA  
20 aerosol optical depth at <http://www.icare.univ-lille1.fr>.

21  
22 *Author contributions:* MC, RF, DJ, and RB developed the algorithms for retrieving aerosol  
23 extinction coefficient and lidar ratio, with inputs from DP. DP conducted the analysis and wrote  
24 the manuscript with contributions from all the co-authors.

25 *Competing interests.* The authors declare that they have no conflict of interest.

26  
27 *Acknowledgements:* This work was funded by the CloudSat and CALIPSO Science Reconnect  
28 Program NASA award # NNH16CY04C. The SODA product is developed at the AERIS/ICARE  
29 data and services center (<http://www.icare.univ-lille1.fr/projects/soda>) in Lille (France) in the  
30 frame of the CALIPSO mission and supported by CNES. The AERIS data infrastructure is greatly  
31 acknowledged for data, processing and development supports of the SODA product.

1 We thank Dr. Gregory Schuster for his insightful comments and suggestions, and Dr. Jacques  
2 Pelon for fruitful discussions related to the SODA product and algorithms.  
3  
4

## 5 **References**

6 Adebisi, A.A., Zuidema, P., and Abel, S.J.: The Convolution of Dynamics and Moisture  
7 with the Presence of Shortwave Absorbing Aerosols over the Southeast Atlantic, *J.*  
8 *Climate*, **28**, 1997–2024, <https://doi.org/10.1175/JCLI-D-14-00352.1>, 2015.

9 Ackermann, J.: The Extinction-to-Backscatter Ratio of Tropospheric Aerosol: A  
10 Numerical Study, *J. Atmos. Oceanic Technol.*, **15**, 1043–1050, [https://doi.org/10.1175/1520-0426\(1998\)015<1043:TETBRO>2.0.CO;2](https://doi.org/10.1175/1520-0426(1998)015<1043:TETBRO>2.0.CO;2), 1998.

12 Ansmann, A.: Ground-truth aerosol lidar observations: can the Klett solutions obtained  
13 from ground and space be equal for the same aerosol case?, *Appl. Optics*, **45**, 3367–3371, 2006.

14 Bohlmann, S., Baars, H., Radenz, M., Engelmann, R., and Macke, A.: Ship-borne aerosol  
15 profiling with lidar over the Atlantic Ocean: from pure marine conditions to complex dust–smoke  
16 mixtures, *Atmos. Chem. Phys.*, **18**, 9661-9679, <https://doi.org/10.5194/acp-18-9661-2018>, 2018.

17 Bourgeois, Q., Ekman, A. M. L., Renard, J.-B., Krejci, R., Devasthale, A., Bender, F., et  
18 al.: How much of the global aerosol optical depth is found in the boundary layer and free  
19 troposphere?, *Atmos. Chem. Phys.*, **18**, 7709-7720, 2018.

20 Bréon, F.-M.: Aerosol extinction-to-backscatter ratio derived from passive satellite  
21 measurements, *Atmos. Chem. Phys.*, **13**, 8947-8954, <https://doi.org/10.5194/acp-13-8947-2013>,  
22 2013.

23 Burton, S. P., et al.: Using airborne high spectral resolution lidar data to evaluate combined  
24 active plus passive retrievals of aerosol extinction profiles, *J. Geophys. Res.*, **115**, D00H15,  
25 doi: 10.1029/2009JD012130, 2010.

26 Burton, S. P., Ferrare, R. A., Hostetler, C. A., Hair, J. W., Rogers, R. R., Obland, M. D., et  
27 al.: Aerosol classification using airborne High Spectral Resolution Lidar measurements –  
28 methodology and examples, *Atmos. Meas. Tech.*, **5**, 73-98, <https://doi.org/10.5194/amt-5-73-2012>,  
29 2012.

30 Burton, S. P., Ferrare, R. A., Vaughan, M. A., Omar, A. H., Rogers, R. R., Hostetler, C.  
31 A., and Hair, J. W.: Aerosol classification from airborne HSRL and comparisons with the

1 CALIPSO vertical feature mask, *Atmos. Meas. Tech.*, 6, 1397-1412, <https://doi.org/10.5194/amt->  
2 6-1397-2013, 2013.

3       Burton, S. P., Hostetler, C. A., Cook, A. L., Hair, J. W., Seaman, S. T., Scola, S., Harper,  
4 D. B., Smith, J. A., Fenn, M. A., Ferrare, R. A., Saide, P. E., Chemyakin, E. V., and Müller, D.:  
5 Calibration of a high spectral resolution lidar using a Michelson interferometer, with data examples  
6 from ORACLES, *Appl. Opt.*, 57, 6061-6075, 2018.

7       Das, S., Dey, S., Dash, S. K., and Basil, G.: Examining mineral dust transport over the  
8 Indian subcontinent using the regional climate model, RegCM4.1, *Atmos. Res.*, 134, 64–76, 2013

9       Das, S., H. Harshvardhan, H. Bian, M. Chin, G. Curci, A. P. Protonotariou, T.  
10 Mielonen, K. Zhang, H. Wang, and X. Liu: Biomass burning aerosol transport and vertical  
11 distribution over the South African-Atlantic region, *J. Geophys. Res. Atmos.*, 122, 6391–6415,  
12 doi: 10.1002/2016JD026421, 2017.

13       Dawson, K. W., Meskhidze, N., Josset, D., and Gassó, S.: Spaceborne observations of the  
14 lidar ratio of marine aerosols, *Atmos. Chem. Phys.*, 15, 3241-3255, <https://doi.org/10.5194/acp-15->  
15 3241-2015, 2015.

16       Deaconu, L. T., Waquet, F., Josset, D., Ferlay, N., Peers, F., Thieuleux, F., Ducos, F.,  
17 Pascal, N., Tanré, D., Pelon, J., and Goloub, P.: Consistency of aerosols above clouds  
18 characterization from A-Train active and passive measurements, *Atmos. Meas. Tech.*, 10, 3499-  
19 3523, <https://doi.org/10.5194/amt-10-3499-2017>, 2017.

20       de Laat, A. T. J., Stein Zweers, D. C., Boers, R., and Tuinder, O. N. E.: A solar escalator:  
21 Observational evidence of the self-lifting of smoke and aerosols by absorption of solar radiation  
22 in the February 2009 Australian Black Saturday plume, *J. Geophys. Res.*, 117, D04204,  
23 doi:10.1029/2011JD017016, 2012.

24       Duncan, B. N. and Bey, I.: A modeling study of the export pathways of pollution from  
25 Europe: Seasonal and interannual variations (1987–1997), *J. Geophys. Res.*, 109, D08301,  
26 doi:10.1029/2003JD004079, 2004.

27       Eloranta, E. W.: High spectral resolution lidar, in *Lidar. Range- Resolved Optical Remote*  
28 *Sensing of the Atmosphere*, edited by C. Weitkamp, pp. 143–163, Springer, New York, 2005.

29       Fernald, F. G.: Analysis of atmospheric lidar observations: Some comments, *Appl. Opt.*, 23,  
30 652–653, doi:10.1364/AO.23.000652, 1984.

1 Ferrare R., Burton, S., Cook A. L., Harper, D. B., Hostetler, C., Hair, J., et al. CALIOP and  
2 Airborne HSRL-2 Measurements of Smoke above low clouds during ORACLES.  
3 CloudSat/CALIPSO Annual Science Review, 23-25 April 2018, Boulder Colorado, USA., 2018.

4 Gravseth, I. J. and Piepe, B.: CloudSat's return to the A-Train, *International Journal of*  
5 *Space Science and Engineering*, 1, 410–431, doi:10.1504/IJSPACESE.2013.059269, 2013.

6 Groß, S., Esselborn, M., Weinzierl, B., Wirth, M., Fix, A., and Petzold, A.: Aerosol  
7 classification by airborne high spectral resolution lidar observations, *Atmos. Chem. Phys.*, 13,  
8 2487-2505, <https://doi.org/10.5194/acp-13-2487-2013>, 2013.

9 Groß, S., Freudenthaler, V., Schepanski, K., Toledano, C., Schäfler, A., Ansmann, A., and  
10 Weinzierl, B.: Optical properties of long-range transported Saharan dust over Barbados as  
11 measured by dual-wavelength depolarization Raman lidar measurements, *Atmos. Chem. Phys.*, 15,  
12 11067-11080, <https://doi.org/10.5194/acp-15-11067-2015>, 2015.

13 Haarig, M., Ansmann, A., Gasteiger, J., Kandler, K., Althausen, D., Baars, H., Radenz, M.,  
14 and Farrell, D. A.: Dry versus wet marine particle optical properties: RH dependence of  
15 depolarization ratio, backscatter, and extinction from multiwavelength lidar measurements during  
16 SALTRACE, *Atmos. Chem. Phys.*, 17, 14199-14217, <https://doi.org/10.5194/acp-17-14199-2017>,  
17 2017.

18 Hair, J. W., Hostetler, C. A., Cook, A. L., Harper, D. B., Ferrare, R. A., Mack, T. L.,  
19 Welch, W., Izquierdo, L. R., and Hovis, F. E.: Airborne high spectral resolution lidar for pro-  
20 filing aerosol optical properties, *Appl. Optics*, 47, 6734–6752, doi:10.1364/AO.47.006734, 2008.

21 Hu, Y., Vaughan, M., Liu, Z., Powell, K., and Rodier, S.: Retrieving optical depths and  
22 lidar ratios for transparent layers above opaque water clouds from CALIPSO lidar  
23 measurements, *IEEE Geosci. Remote Sens. Lett.*, 4(4), 523–526, doi:10.1109/LGRS.2007.901085,  
24 2007.

25 Itahashi, S., K. Yumimoto, I. Uno, K. Eguchi, T. Takemura, Y. Hara, A. Shimizu, N.  
26 Sugimoto, and Liu, Z.: Structure of dust and air pollutant outflow over East Asia in the  
27 spring, *Geophys. Res. Lett.*, 37, L20806, doi: 10.1029/2010GL044776, 2010.

28 Jethva, H., Torres, O., Waquet, F., Chand, D., and Hu, Y.: How do A-train sensors  
29 intercompare in the retrieval of above-cloud aerosol optical depth? A case study-based  
30 assessment, *Geophys. Res. Lett.*, 41, 186–192, doi: 10.1002/2013GL058405, 2014.

1           Josset, D., Pelon, J., Protat, A., and Flamant, C.: New approach to determine aerosol  
2 optical depth from combined CALIPSO and CloudSat ocean surface echoes, *Geophys. Res.*  
3 *Lett.*, 35, L10805, doi: 10.1029/2008GL033442, 2008.

4           Josset, D., Pelon, J., and Hu, Y.: Multi-instrument calibration method based on a  
5 multiwavelength ocean surface model, *IEEE Geosci. Remote Sens. Lett.*, 7, 195–199, doi:  
6 10.1109/LGRS.2009.2030906, 2010.

7           Josset D., Rogers, R., Pelon, J., Hu, Y., Liu, Z., Omar, A., et al.: CALIPSO lidar ratio  
8 retrieval over the ocean, *Opt. Express*, 19, 18696-18706, 2011.

9           Josset, D., Tanelli, S., Hu, Y., Pelon, J., Zhai, P.: Analysis of water vapor correction for  
10 CloudSat W-band radar", *IEEE Trans. Geosci. Remote Sens.*, vol. 51, no. 7, pp. 3812-3825, 2013.

11          Josset, D., Hou, W., Pelon, J., Hu, Y., Tanelli, S., Ferrare, R., et al.: Ocean and polarization  
12 observations from active remote sensing: atmospheric and ocean science applications. *Proc. SPIE*  
13 *9459, Ocean Sensing and Monitoring VII*, 94590N, doi:10.1117/12.2181544, 2015.

14          Khaykin, S. M., Godin-Beekmann, S., Hauchecorne, A., Pelon, J., Ravetta, F., and  
15 Keckhut, P.: Stratospheric smoke with unprecedentedly high backscatter observed by lidars above  
16 southern France, *Geophys. Res. Lett.*, 45, 1639–1646, doi:10.1002/2017GL076763, 2018.

17          Kim, M.-H., Kim, S.-W., Yoon, S.-C., and Omar, A. H.: Comparison of aerosol optical  
18 depth between CALIOP and MODIS-Aqua for CALIOP aerosol subtypes over the ocean, *J.*  
19 *Geophys. Res. Atmos.*, 118, 13,241–13,252, doi: 10.1002/2013JD019527, 2013.

20          Kim, M.-H., Omar, A. H., Vaughan, M. A., Winker, D. M., Trepte, C. R., Hu, Y., Liu, Z.,  
21 and Kim, S.-W.: Quantifying the low bias of CALIPSO's column aerosol optical depth due to  
22 undetected aerosol layers, *J. Geophys. Res. Atmos.*, 122, 1098–1113, doi:10.1002/2016JD025797,  
23 2017.

24          Kim, M.-H., Omar, A. H., Tackett, J. L., Vaughan, M. A., Winker, D. M., Trepte, C. R.,  
25 Hu, Y., Liu, Z., Poole, L. R., Pitts, M. C., Kar, J., and Magill, B. E.: The CALIPSO Version 4  
26 Automated Aerosol Classification and Lidar Ratio Selection Algorithm, *Atmos. Meas. Tech.*  
27 *Discuss.*, <https://doi.org/10.5194/amt-2018-166>, in review, 2018.

28          Kittaka, C., Winker, D. M., Vaughan, M. A., Omar, A., and Remer, L. A.: Intercomparison  
29 of column aerosol optical depths from CALIPSO and MODIS-Aqua, *Atmos. Meas. Tech.*, 4, 131-  
30 141, <https://doi.org/10.5194/amt-4-131-2011>, 2011.

1 Koffi, B., et al.: Evaluation of the aerosol vertical distribution in global aerosol models  
2 through comparison against CALIOP measurements: AeroCom phase II results, *J. Geophys. Res.*  
3 *Atmos.*, 121, 7254–7283, doi: 10.1002/2015JD024639, 2016.

4 Krishnamurti, T. N., Chakraborty, A., Martin, A., Lau, W. K., Kim, K.-M., Sud, Y., and  
5 Walker, G.: Impact of Arabian Sea pollution on the Bay of Bengal winter monsoon rains, *J.*  
6 *Geophys. Res.*, 114, D06213, doi: 10.1029/2008JD010679, 2009.

7 Levy, R. C., Mattoo, S., Munchak, L. A., Remer, L. A., Sayer, A. M., Patadia, F., and Hsu,  
8 N. C.: The Collection 6 MODIS aerosol products over land and ocean, *Atmos. Meas. Tech.*, 6,  
9 2989-3034, <https://doi.org/10.5194/amt-6-2989-2013>, 2013.

10 Liu, Z., Omar, A., Vaughan, M., Hair, J., Kittaka, C., Hu, Y., Powell, K., Trepte, C.,  
11 Winker, D., Hostetler, C., Ferrare, R., and Pierce, R.: CALIPSO lidar observations of the optical  
12 properties of Saharan dust: A case study of long-range transport, *J. Geophys. Res.*, 113, D07207,  
13 doi: 10.1029/2007JD008878, 2008.

14 Liu, Z., Winker, D., Omar, A., Vaughan, M., Kar, J., Trepte, C., Hu, Y., and Schuster, G.:  
15 Evaluation of CALIOP 532 nm aerosol optical depth over opaque water clouds, *Atmos. Chem.*  
16 *Phys.*, 15, 1265-1288, <https://doi.org/10.5194/acp-15-1265-2015>, 2015.

17 Liu, Z., Kar, J., Zeng, S., Tackett, J., Vaughan, M., Avery, M., Pelon, J., Getzewich, B.,  
18 Lee, K.-P., Magill, B., Omar, A., Lucker, P., Trepte, C., and Winker, D.: Discriminating between  
19 clouds and aerosols in the CALIOP version 4.1 data products, *Atmos. Meas. Tech.*, 12, 703-734,  
20 <https://doi.org/10.5194/amt-12-703-2019>, 2019.

21 McGrath-Spangler, E. L., and Denning, A. S.: Global seasonal variations of midday  
22 planetary boundary layer depth from CALIPSO space-borne LIDAR, *J. Geophys. Res.*  
23 *Atmos.*, 118, 1226–1233, doi: 10.1002/jgrd.50198, 2013.

24 McGrath-Spangler, E. L. and Molod, A.: Comparison of GEOS-5 AGCM planetary  
25 boundary layer depths computed with various definitions. *Atmos. Chem. Phys.*, 14, 6717-6727,  
26 <https://doi.org/10.5194/acp-14-6717-2014>, 2014.

27 Mona, L., Amodeo, A., Pandolfi, M., and Pappalardo, G.: Saharan dust intrusions in the  
28 Mediterranean area: Three years of Raman lidar measurements. *J. Geophys. Res.*, 111, D16203,  
29 doi:[10.1029/2005JD006569](https://doi.org/10.1029/2005JD006569), 2006.

1 Müller, D., Ansmann, A., Mattis, I., Tesche, M., Wandinger, U., Althausen, D., and Pisani,  
2 G.: Aerosol-type-dependent lidar ratios observed with Raman lidar, *J. Geophys. Res.*, 112,  
3 D16202, doi: 10.1029/2006JD008292, 2007.

4 Noh, Y. M., Kima, Y. J., and Müller, D.: Seasonal characteristics of lidar ratios measured  
5 with a Raman lidar at Gwangju, Korea in spring and autumn, *Atmos. Environ.*, 42, 2208–2224,  
6 doi:10.1016/j.atmosenv.2007.11.045, 2008.

7 Nowottnick, E. P., Colarco, P. R., Welton, E. J., and da Silva, A.: Use of the CALIOP  
8 vertical feature mask for evaluating global aerosol models, *Atmos. Meas. Tech.*, 8, 3647-3669,  
9 <https://doi.org/10.5194/amt-8-3647-2015>, 2015.

10 Redemann, J., Vaughan, M. A., Zhang, Q., Shinozuka, Y., Russell, P. B., Livingston, J.  
11 M., Kacenelenbogen, M., and Remer, L. A.: The comparison of MODIS-Aqua (C5) and CALIOP  
12 (V2 & V3) aerosol optical depth, *Atmos. Chem. Phys.*, 12, 3025-3043,  
13 <https://doi.org/10.5194/acp-12-3025-2012>, 2012.

14 Roberts, G., Wooster, M. J., and Lagoudakis, E.: Annual and diurnal african biomass  
15 burning temporal dynamics, *Biogeosciences*, 6, 849-866, <https://doi.org/10.5194/bg-6-849-2009>,  
16 2009.

17 Rogers, R. R., Hair, J. W., Hostetler, C. A., Ferrare, R. A., Obland, M. D., Cook, A. L.,  
18 Harper, D. B., Burton, S. P., Shinozuka, Y., McNaughton, C. S., Clarke, A. D., Redemann, J.,  
19 Russell, P. B., Livingston, J. M., and Kleinman, L. I.: NASA LaRC airborne high spectral  
20 resolution lidar aerosol measurements during MILAGRO: observations and validation, *Atmos.*  
21 *Chem. Phys.*, 9, 4811-4826, <https://doi.org/10.5194/acp-9-4811-2009>, 2009.

22 Rogers, R. R., Vaughan, M. A., Hostetler, C. A., Burton, S. P., Ferrare, R. A., Young, S.  
23 A., Hair, J. W., Obland, M. D., Harper, D. B., Cook, A. L., and Winker, D. M.: Looking through  
24 the haze: evaluating the CALIPSO level 2 aerosol optical depth using airborne high spectral  
25 resolution lidar data, *Atmos. Meas. Tech.*, 7, 4317-4340, <https://doi.org/10.5194/amt-7-4317-2014>,  
26 2014.

27 Royer, P., Raut, J.-C., Ajello, G., Berthier, S., and Chazette, P.: Synergy between CALIOP  
28 and MODIS instruments for aerosol monitoring: application to the Po Valley, *Atmos. Meas. Tech.*,  
29 3, 893-907, <https://doi.org/10.5194/amt-3-893-2010>, 2010.

30 Sawamura, P., Moore, R. H., Burton, S. P., Chemyakin, E., Müller, D., Kolgotin, A.,  
31 Ferrare, R. A., Hostetler, C. A., Ziemba, L. D., Beyersdorf, A. J., and Anderson, B. E.: HSRL-2



1 aerosol optical measurements and microphysical retrievals vs. airborne in situ measurements  
2 during DISCOVER-AQ 2013: an intercomparison study, *Atmos. Chem. Phys.*, 17, 7229-7243,  
3 <https://doi.org/10.5194/acp-17-7229-2017>, 2017.

4 Schuster, G. L., Vaughan, M., MacDonnell, D., Su, W., Winker, D., Dubovik, O.,  
5 Lapyonok, T., and Trepte, C.: Comparison of CALIPSO aerosol optical depth retrievals to  
6 AERONET measurements, and a climatology for the lidar ratio of dust, *Atmos. Chem. Phys.*, 12,  
7 7431-7452, <https://doi.org/10.5194/acp-12-7431-2012>, 2012.

8 Tesche, M., Gross, S., Ansmann, A., Müller, D., Althausen, D., Freudenthaler, V., and  
9 Esselborn, M.: Profiling of Saharan dust and biomass-burning smoke with multiwavelength  
10 polarization Raman lidar at Cape Verde, *Tellus*, B63, 649–676, doi:10.1111/j.1600-  
11 0889.2011.00548.x, 2011.

12 Thorsen, T. J., Ferrare, R. A., Hostetler, C. A., Vaughan, M. A., and Fu, Q.: The impact of  
13 lidar detection sensitivity on assessing aerosol direct radiative effects, *Geophys. Res. Lett.*, 44,  
14 9059–9067, doi:10.1002/2017GL074521, 2017.

15 Toth, T. D., Campbell, J. R., Reid, J. S., Tackett, J. L., Vaughan, M. A., Zhang, J., and  
16 Marquis, J. W.: Minimum aerosol layer detection sensitivities and their subsequent impacts on  
17 aerosol optical thickness retrievals in CALIPSO level 2 data products, *Atmos. Meas. Tech.*, 11,  
18 499-514, <https://doi.org/10.5194/amt-11-499-2018>, 2018.

19 Uno, I., Eguchi, K., Yumimoto, K., Liu, Z., Hara, Y., Sugimoto, N., Shimizu, A., and  
20 Takemura, T.: Large Asian dust layers continuously reached North America in April 2010, *Atmos.*  
21 *Chem. Phys.*, 11, 7333-7341, <https://doi.org/10.5194/acp-11-7333-2011>, 2011.

22 Várnai, T. and Marshak, A.: Global CALIPSO observations of aerosol changes near clouds,  
23 *IEEE Geosci. Remote Sens. Lett.*, 8, 19–23, 2011.

24 Vaughan, M., Winker, D. M., and Powell, K. A.: CALIOP algorithm theoretical basis  
25 document, Part 2: Feature detection and layer properties algorithms. NASA Langley Research  
26 Center Document PC-SCI-202 Part 2, 87 pp. [Available online at [http://www-  
27 calipso.larc.nasa.gov/resources/pdfs/PC-SCI\\_202\\_Part2\\_rev1x01.pdf](http://www-calipso.larc.nasa.gov/resources/pdfs/PC-SCI_202_Part2_rev1x01.pdf)], 2005.

28 von Engel, A., and Teixeira, J.: A Planetary Boundary Layer Height Climatology Derived  
29 from ECMWF Reanalysis Data. *J. Climate*, 26, 6575–6590, [https://doi.org/10.1175/JCLI-D-12-  
00385.1](https://doi.org/10.1175/JCLI-D-12-<br/>30 00385.1), 2013.

1 Winker, D.M., Vaughan, M.A., Omar, A., Hu, Y., Powell, K.A., Liu, Z., et al.: Overview  
2 of the CALIPSO Mission and CALIOP Data Processing Algorithms, *J. Atmos. Oceanic*  
3 *Technol.*, **26**, 2310–2323, <https://doi.org/10.1175/2009JTECHA1281.1>, 2009.

4 Winker, D. M., and et al.: The CALIPSO Mission: A global 3D view of aerosols and  
5 clouds, *Bull. Am. Meteorol. Soc.*, **91**, 1211–1229, doi:10.1175/2010BAMS3009.1, 2010.

6 Winker, D. M., Tackett, J. L., Getzewich, B. J., Liu, Z., Vaughan, M. A., and Rogers, R.  
7 R.: The global 3-D distribution of tropospheric aerosols as characterized by CALIOP, *Atmos.*  
8 *Chem. Phys.*, 13, 3345-3361, <https://doi.org/10.5194/acp-13-3345-2013>, 2013.

9 Yu, H., Chin, M., Winker, D. M., Omar, A. H., Liu, Z., Kittaka, C., and Diehl, T.: Global  
10 view of aerosol vertical distributions from CALIPSO lidar measurements and GOCART  
11 simulations: Regional and seasonal variations, *J. Geophys. Res.*, 115, D00H30,  
12 doi:10.1029/2009JD013364, 2010.

13 Yu, H., Chin, M., Yuan, T., Bian, H., Remer, L. A., Prospero, J. M., Omar, A., Winker, D.,  
14 Yang, Y., Zhang, Y., Zhang, Z., and Zhao, C.: The Fertilizing Role of African Dust in the Amazon  
15 Rainforest: A First Multiyear Assessment Based on CALIPSO Lidar Observations, *Geophys. Res.*  
16 *Lett.*, **42**, 1984–1991, doi:10.1002/2015GL063040., 2015.

17  
18  
19  
20  
21  
22  
23  
24  
25  
26  
27  
28  
29  
30  
31

1  
2  
3  
4

## Figures

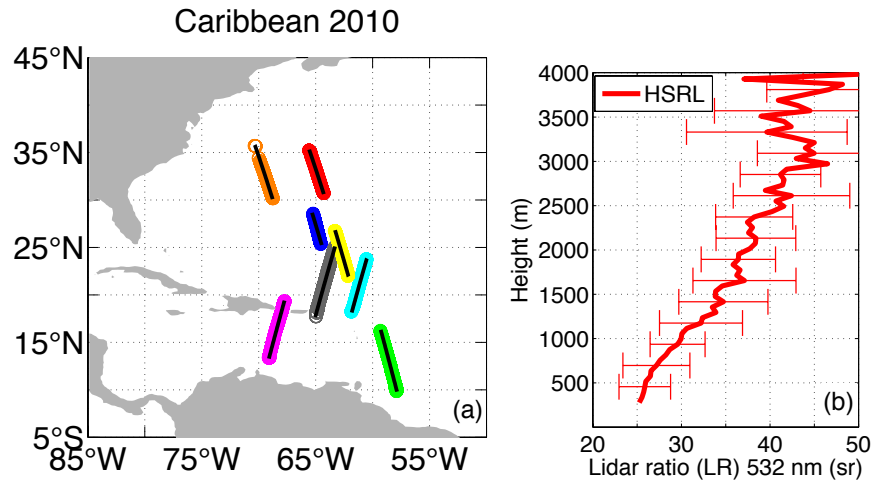

5  
6  
7  
8  
9  
10  
11  
12  
13  
14  
15  
16  
17  
18  
19  
20  
21  
22

Figure 1: a) Flight tracks during the 2010 field campaign (individual flight missions). Black solid lines correspond to the matched CALIPSO tracks. b) Mean HSRL lidar ratio (532 nm) as a function of altitude and one standard deviation (error bar) for all the flight tracks in Fig. 1a.

1  
2  
3

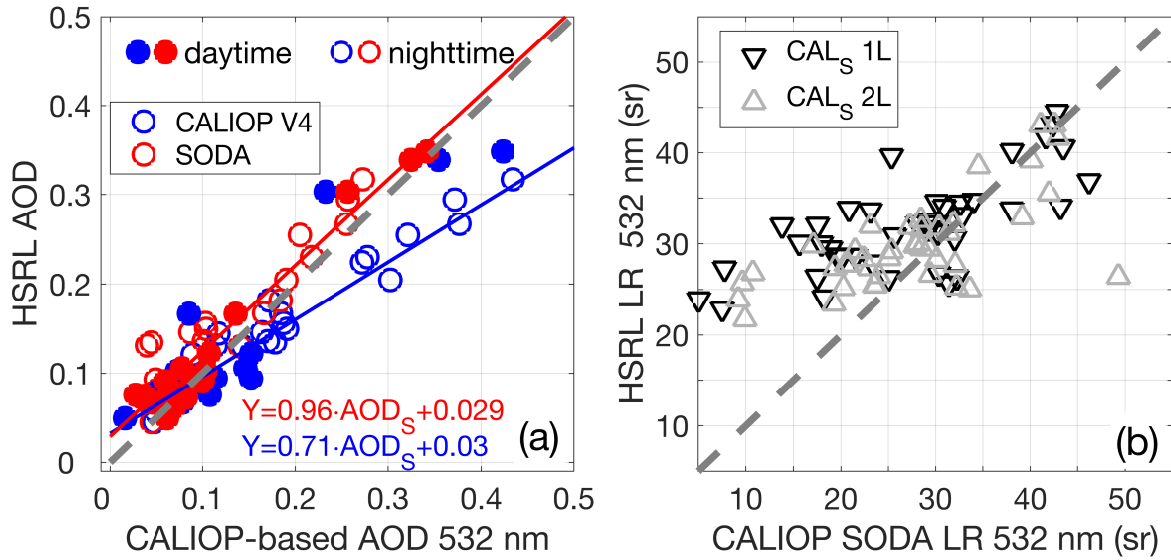

4  
5  
6  
7  
8  
9  
10  
11  
12  
13  
14  
15  
16  
17  
18  
19  
20  
21

Figure 2: a) Scatterplot between SODA (red) and CALIPSO V4 (blue) against HSRL AOD at 532 nm. Filled and open circles indicate daytime and nighttime observations, respectively. Blue and red lines (and equations) are the linear fit for V4 and SODA AOD ( $AOD_{V4}$  and  $AOD_S$ ) relative to HSRL. b) Comparison between CALIPSO SODA ( $CAL_S$ ) lidar ratio based on the 1-layer (1L) and 2-layer (2L) assumption with the HSRL column-effective lidar ratio from Eq. 4 (black and gray symbols, respectively). Gray dashed line is the one-to-one relationship.

1  
2  
3

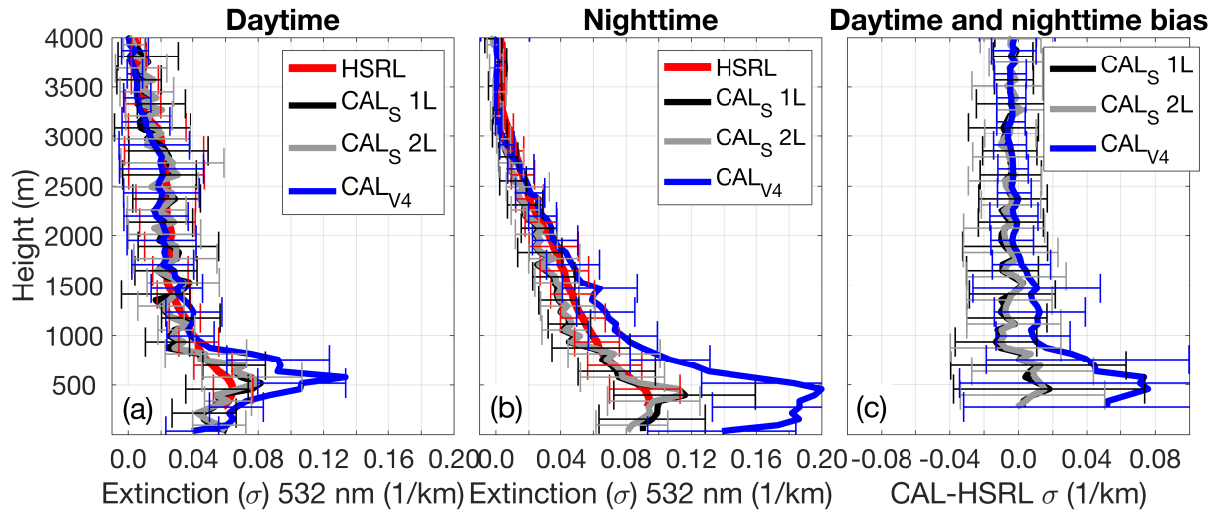

4  
5  
6  
7  
8  
9  
10  
11  
12  
13  
14  
15  
16  
17  
18  
19  
20  
21  
22

Figure 3: Mean aerosol extinction coefficient profile from the HSRL (red), CALIPSO SODA 1L (black), 2L (gray), and CALIPSO standard V4 product (blue) during a) daytime and b) nighttime. c) Total mean bias of CALIPSO-based extinction relative to the HSRL: CALIPSO SODA 1L (black) and 2L (gray), CALIPSO V4 (blue). Error bars in Fig. 3 a and b denote one standard deviation, and RMSE in Fig. 3c.

1  
2  
3

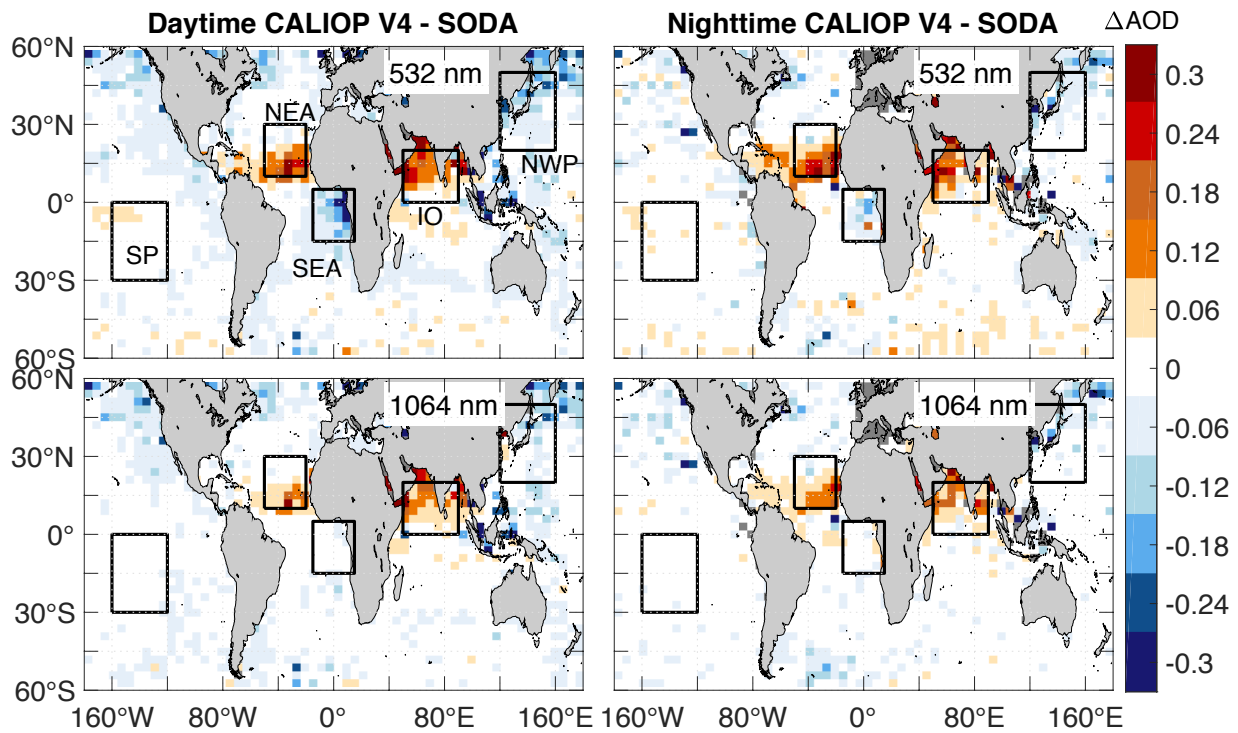

4  
5  
6  
7  
8  
9  
10  
11  
12  
13  
14  
15  
16  
17  
18  
19

Figure 4: Mean AOD difference between CALIOP V4 and SODA for five months of 2010 for daytime (left) and nighttime (right), and the 532 nm (upper panels) and 1064 nm (lower panels) channels. Boxes denote specific regions in which the extinction coefficient profiles are further compared in Figure 5: South Pacific (SP), southeast Atlantic (SEA), Indian Ocean (IO), northeast Atlantic (NEA), and northwest Pacific (NWP).

1  
2  
3  
4  
5  
6  
7  
8  
9  
10  
11  
12  
13  
14  
15  
16  
17  
18  
19  
20  
21  
22  
23

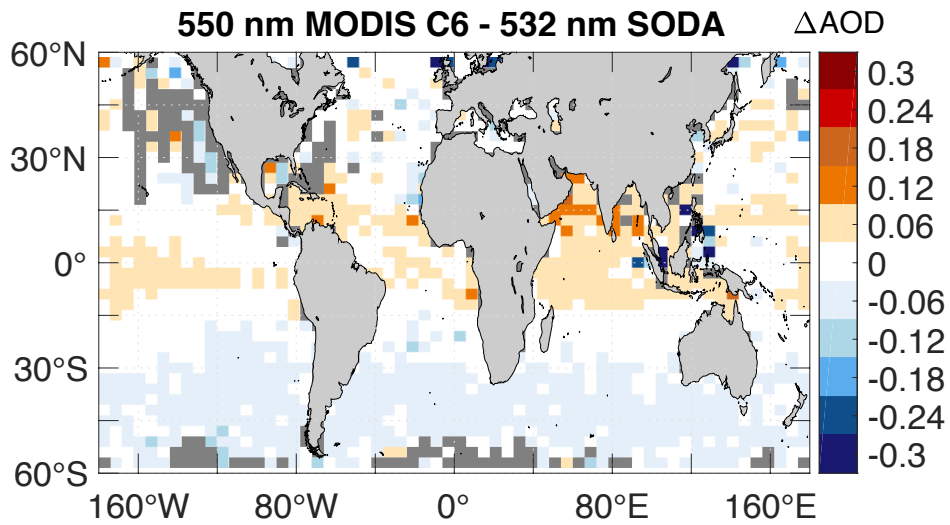

Figure 5: Mean AOD difference between matched 550 nm MODIS C6 and 532nm SODA daytime AOD for five months of 2010. Oceanic regions with no available MODIS samples that meet the matching criteria are depicted in dark gray.

1  
2  
3

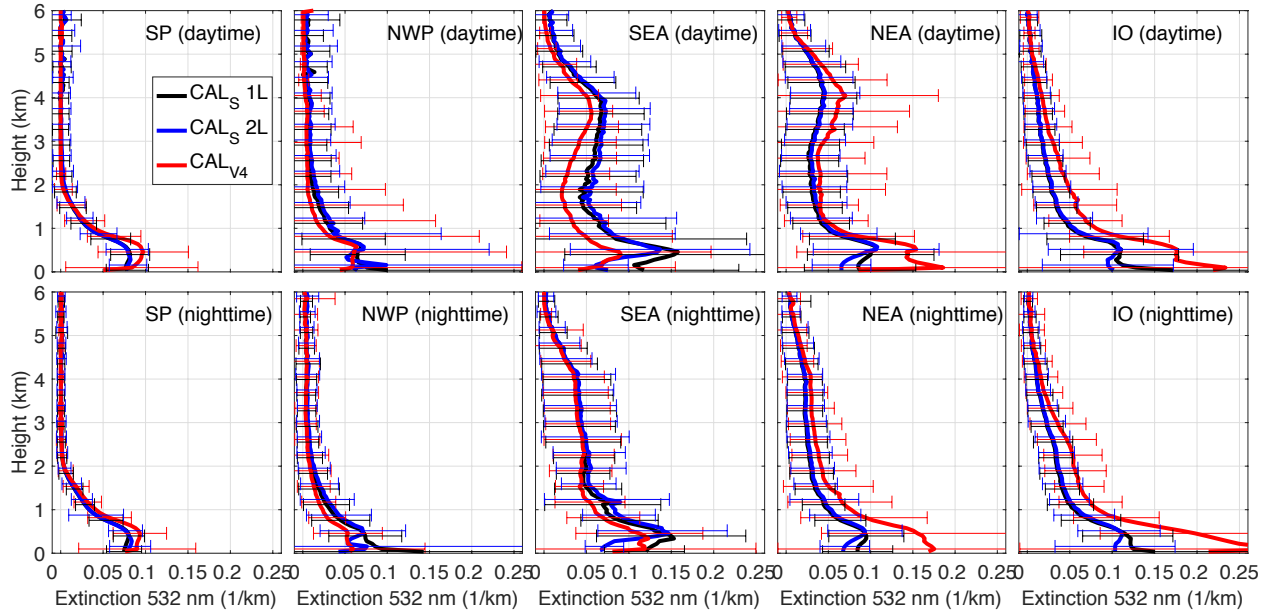

4  
5  
6  
7  
8

Figure 6: Mean aerosol extinction coefficient at 532 nm for the five regions defined in Fig. 4. Upper and lower panels correspond to daytime and nighttime retrievals. CALIPSO-SODA profiles are in black (1L) and blue (2L), and CALIPSO V4 is in red.

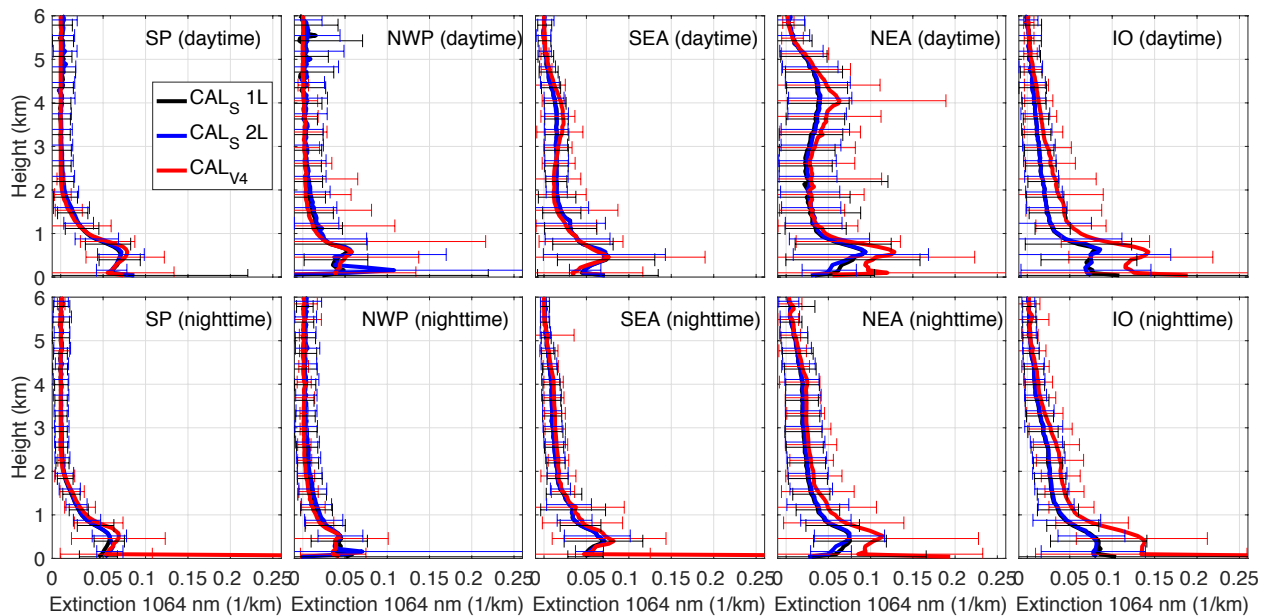

9  
10

Figure 7: As in Figure 5 but for the 1064 nm channel.



1  
2  
3

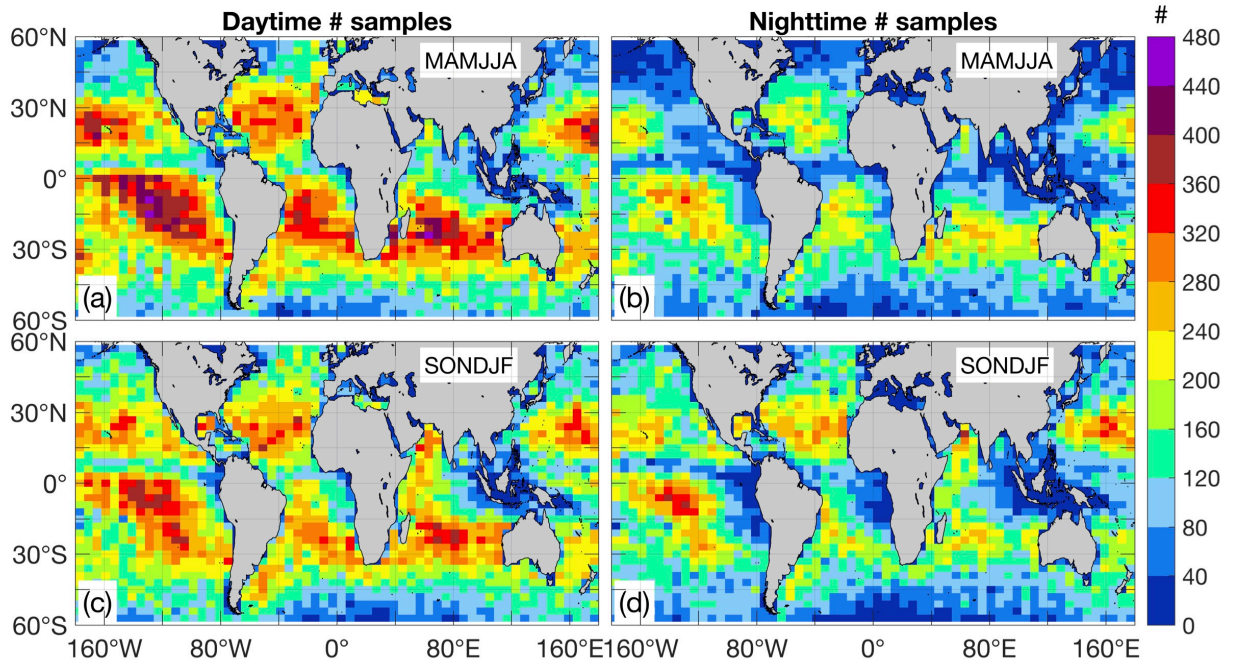

4  
5  
6  
7  
8  
9  
10  
11  
12  
13  
14  
15  
16  
17  
18  
19

Figure 8: Number of 25-km CALIOP-SODA samples contained in each semiannual average: a) daytime MAMJJA, b) Nighttime MAMJJA, c) Daytime SONDJF, d) Nighttime SONDJF.

1  
2  
3

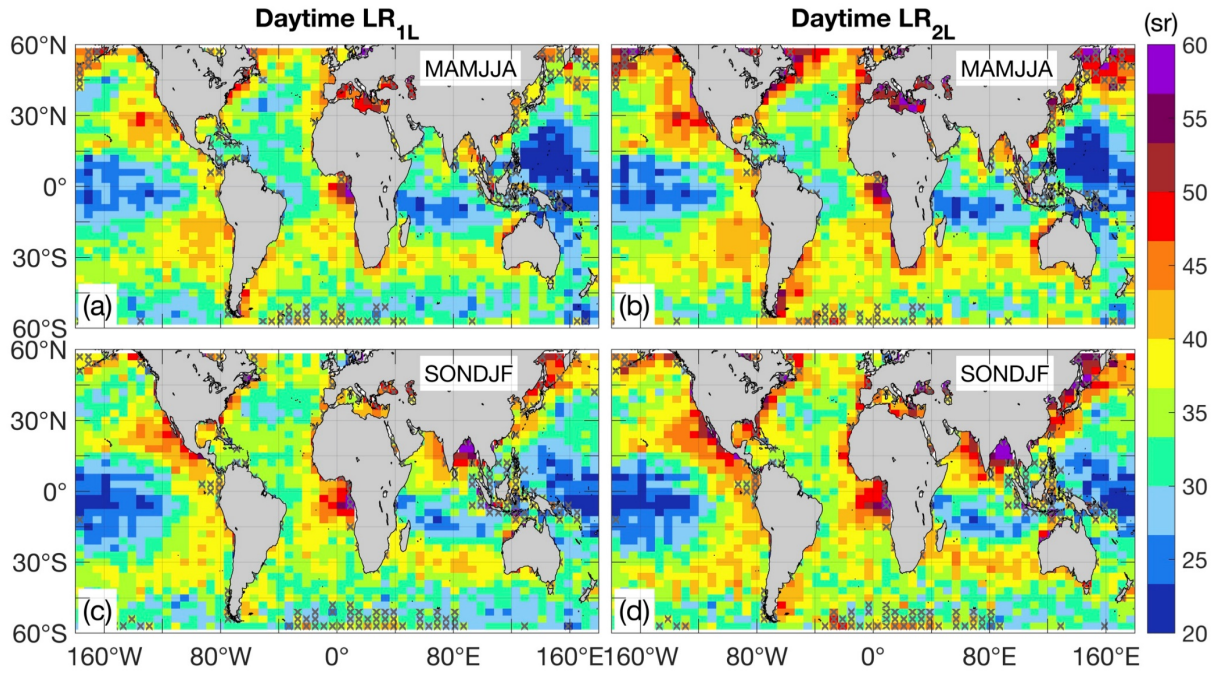

4  
5  
6  
7  
8  
9  
10  
11  
12  
13  
14  
15  
16  
17  
18  
19

Figure 9: Semi-annual daytime 532 nm lidar ratios. a) LR<sub>1L</sub> for spring-summer, b) LR<sub>2L</sub> for spring-summer, c) LR<sub>1L</sub> for autumn-winter, and d) LR<sub>2L</sub> for autumn-winter. Gray crosses indicate regions where less than 15% of the maximum observable number of samples contribute to the average.

1  
2  
3

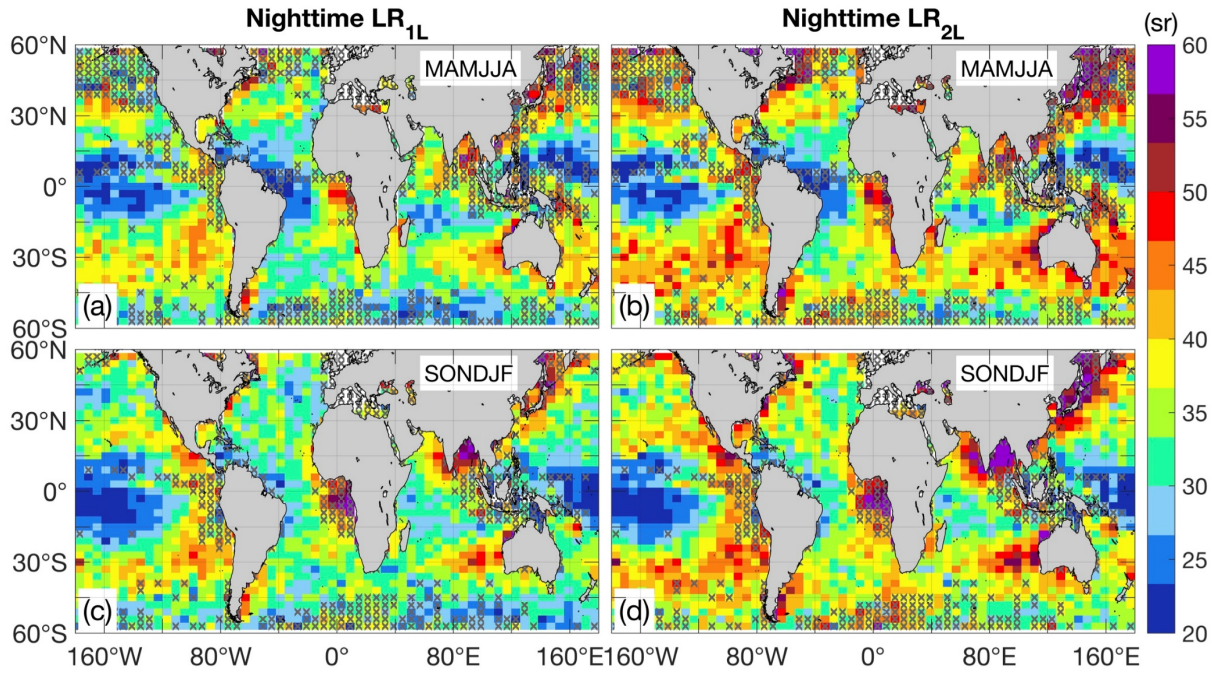

4  
5  
6  
7  
8  
9  
10  
11  
12  
13  
14  
15  
16  
17  
18  
19

Figure 10: As in Figure 9 but for nighttime.

1  
2  
3

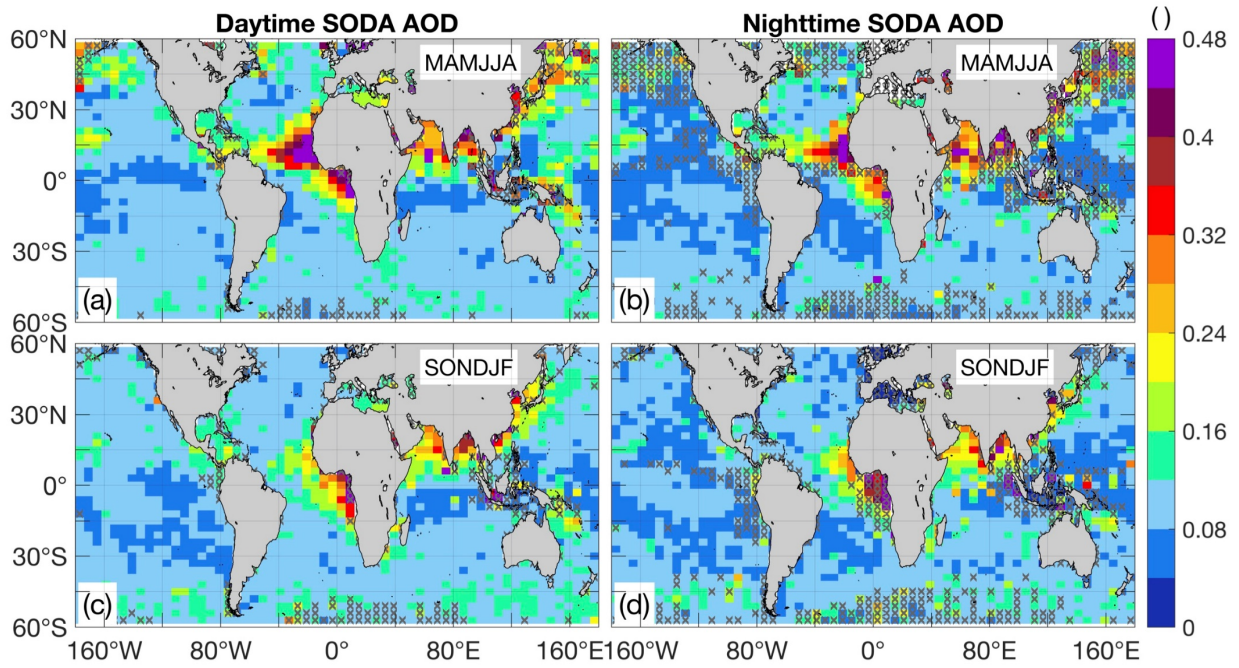

4  
5  
6  
7  
8  
9  
10  
11  
12  
13  
14  
15  
16  
17  
18  
19

Figure 11: SODA AOD for daytime (a and c) and nighttime (b and d), spring-summer (MAMJJA) and autumn-winter (SONDJF). Gray crossed are described in Figure 9.

1  
2  
3

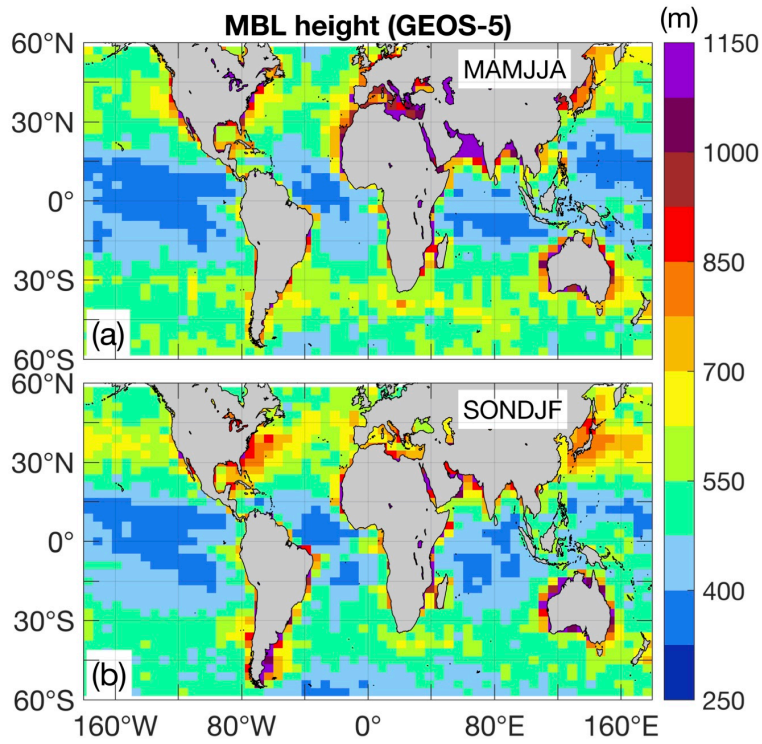

4  
5  
6  
7  
8  
9  
10  
11  
12  
13  
14  
15  
16  
17

Figure 12: Daytime marine boundary layer height for a) spring-summer, and b) autumn-winter.

1  
2  
3

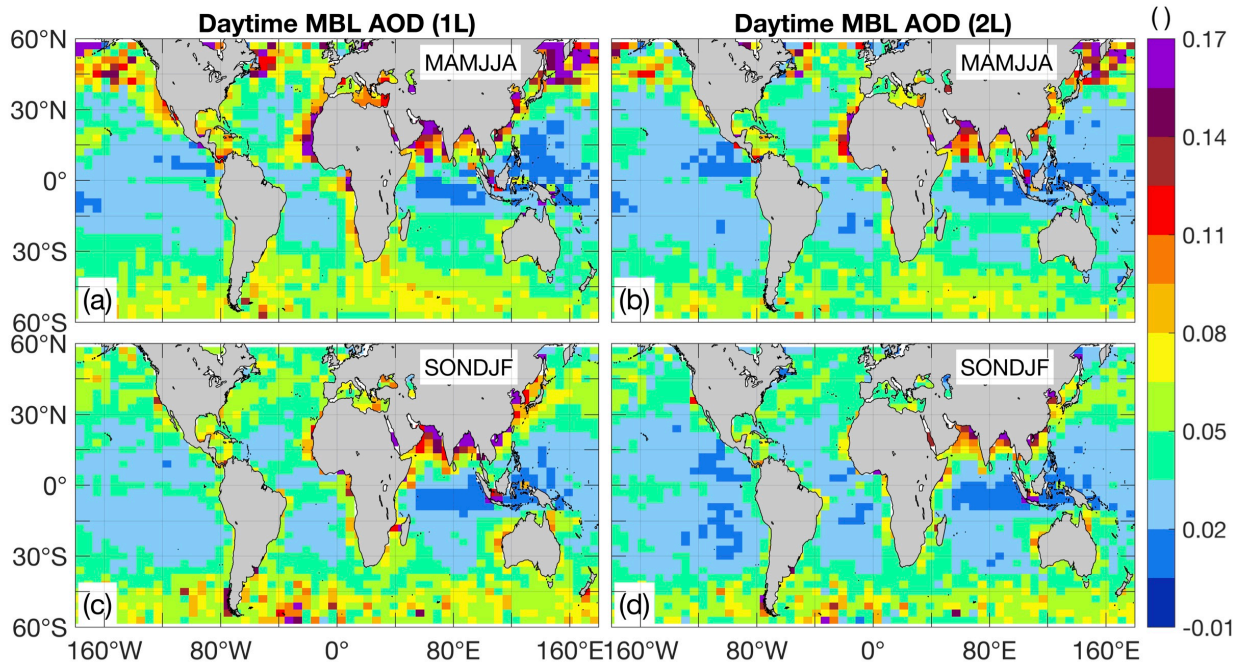

4  
5  
6  
7  
8  
9  
10  
11  
12  
13  
14  
15  
16  
17  
18  
19

Figure 13: Daytime MBL 532 nm AOD based on 1L (left) and 2L (right).

1  
2  
3

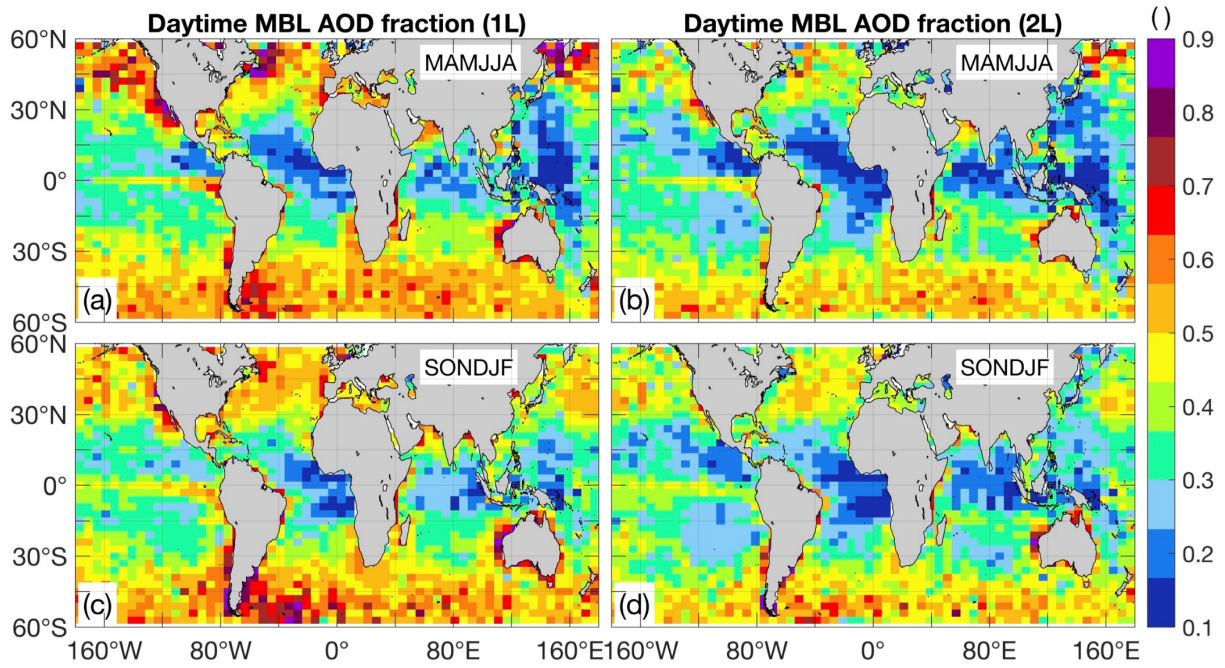

4  
5  
6  
7  
8  
9  
10  
11  
12  
13  
14  
15  
16  
17  
18  
19

Figure 14: Fraction of daytime AOD contributed by the marine boundary layer.

1 **Tables**

2  
3  
4

5 Table 1: Linear correlation coefficient ( $r$ ), mean bias, and RSME between HSRL and SODA and  
6 CALIOP Standard V4 AOD. Percentages are calculated relative to the mean HSRL AOD.

| <b>CALIOP-based AOD</b> | $r$  | <b>Mean bias</b> | <b>RSME</b>   |
|-------------------------|------|------------------|---------------|
| <b>SODA</b>             | 0.96 | -0.024 (-17%)    | 0.035 (24.2%) |
| <b>Standard V4</b>      | 0.94 | 0.014 (10%)      | 0.044 (31.2%) |

7  
8  
9

10 Table 2: As in Table 1 but for CALIOP-SODA lidar ratio

| <b>CALIOP SODA<br/>LR</b> | $r$  | <b>Mean bias</b> | <b>RSME</b>    |
|---------------------------|------|------------------|----------------|
| 1 layer (1L)              | 0.67 | -2.5 sr (-8.1%)  | 7.4 sr (27.1%) |
| 2 layer (2L)              | 0.72 | -4.7 sr (-17.4%) | 8.7 sr (32.0%) |

11

12 Table 3: As in Table 1 but for V4 and SODA aerosol extinction coefficient in the lower troposphere  
13 (below 3.0 km).

| <b>CALIOP-based<br/>extinction</b> | $r$  | <b>Mean bias</b>                 | <b>RMSE</b>                     |
|------------------------------------|------|----------------------------------|---------------------------------|
| CALIOP V4                          | 0.82 | 0.013 km <sup>-1</sup> (33.0%)   | 0.043 km <sup>-1</sup> (106.0%) |
| SODA 1 layer (1L)                  | 0.78 | -0.0037 km <sup>-1</sup> (-9.2%) | 0.028 km <sup>-1</sup> (72.6%)  |
| SODA 2 layer (2L)                  | 0.79 | -0.0029 km <sup>-1</sup> (-7.0%) | 0.028 km <sup>-1</sup> (73.8%)  |

14
